# Supplementary material
Source: MDPI journal article supplement (https://www.mdpi.com/2624-781X/3/1/2)
Supplement: s1 [file s1]

## **SUPPORTING INFORMATION**

# **Thiol-Ene Click-Inspired Late-Stage Modification of Long-Chain Polyurethane Dendrimers**

**Dhruba P. Poudel <sup>1</sup> and Richard T. Taylor <sup>1,\*</sup>**

<sup>1</sup> Department of Chemistry and Biochemistry, Miami University, Oxford, OH 45056, USA;  
poudeld@miamioh.edu

\* Correspondence: taylorrt@miamioh.edu

## Table of Contents

|           |                                                                                                                                          |           |
|-----------|------------------------------------------------------------------------------------------------------------------------------------------|-----------|
| <b>1.</b> | <b><i>Extended structure of G1 – G3 dendrons and dendrimers.....</i></b>                                                                 | <b>3</b>  |
| <b>2.</b> | <b><i>Copies of <math>^1\text{H}</math>, <math>^{13}\text{C}</math> NMR, and 2D spectra of G2 – G3 dendrons and dendrimers .....</i></b> | <b>8</b>  |
| <b>3.</b> | <b><i>Diffusion order experiments of G1 – G3 dendrimers.....</i></b>                                                                     | <b>31</b> |
| <b>4.</b> | <b><i>Mass spectrometric data of G2 – G3 dendrons and dendrimers.....</i></b>                                                            | <b>37</b> |
| <b>5.</b> | <b><i>FT – IR spectra of G2 – G3 compounds.....</i></b>                                                                                  | <b>41</b> |
| <b>6.</b> | <b><i>UV-Vis and fluorescence study of G3 dendrimer (G3D).....</i></b>                                                                   | <b>46</b> |

## 1. Extended structure of G1 – G3 dendrons and dendrimers

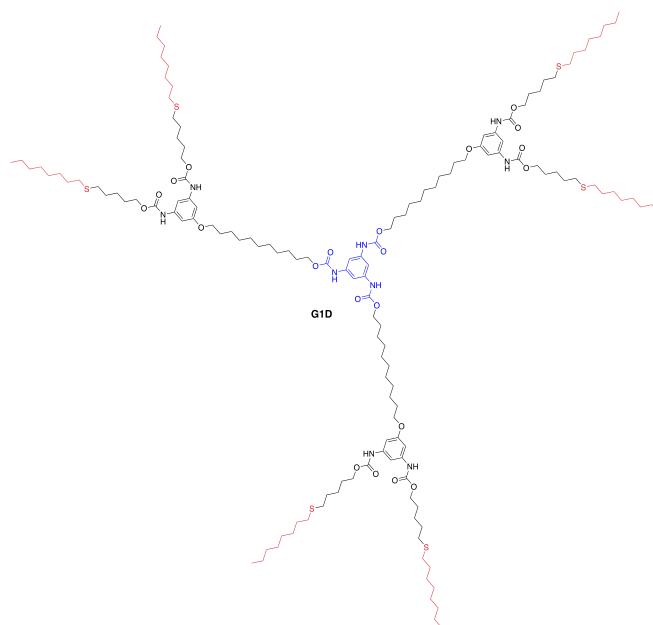

  
Core

Figure S1. Expanded structure of thiol-ene functionalized **G1D** (*top*) and its ball and stick (3D, hydrogen atoms are removed) model with lowest energy (*bottom*, 457.9 kJ/mol at 298 K). Red = oxygen atom, blue = nitrogen atom, yellow = sulfur atom.

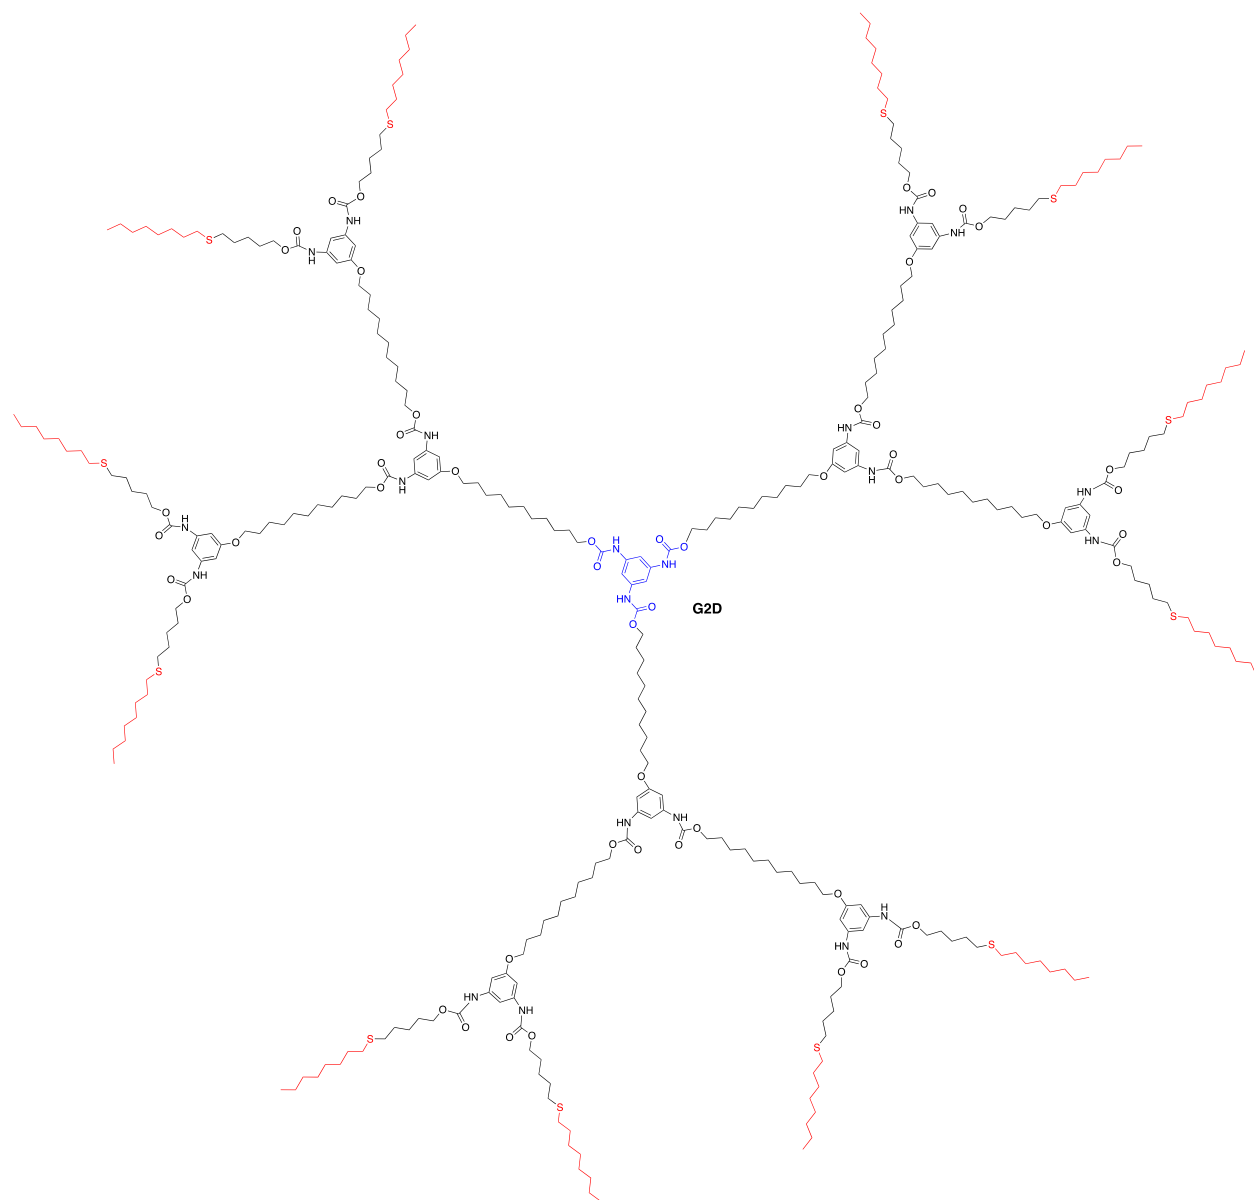

Figure S2. Expanded structure of thiol-ene functionalized **G2D**.

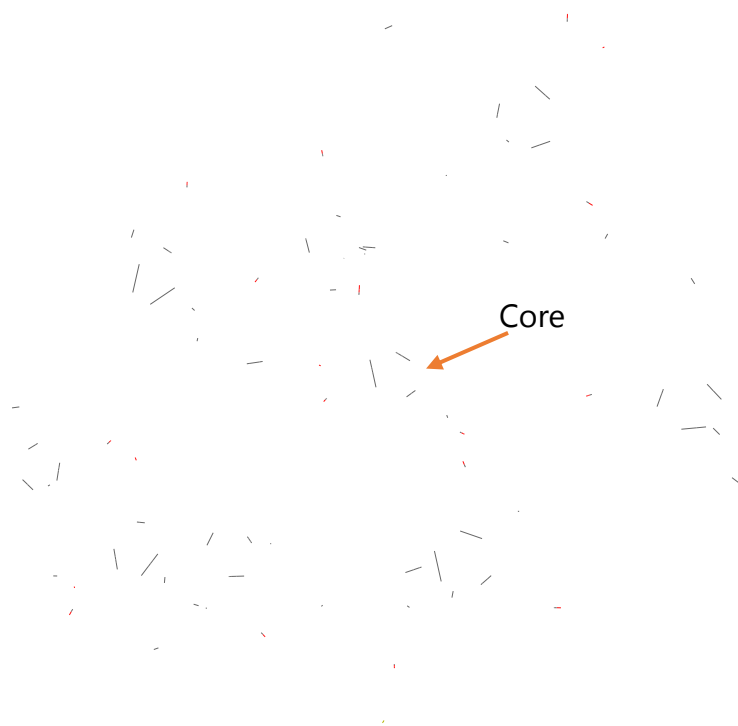

Figure S3. Optimized geometry (with the hydrogen atoms removed) of thiol-ene functionalized G2D showing 3D ball and stick model ( $E = 750.0$  kJ/mol at 298 K). Red = oxygen atom, blue = nitrogen atom, yellow = sulfur atom.

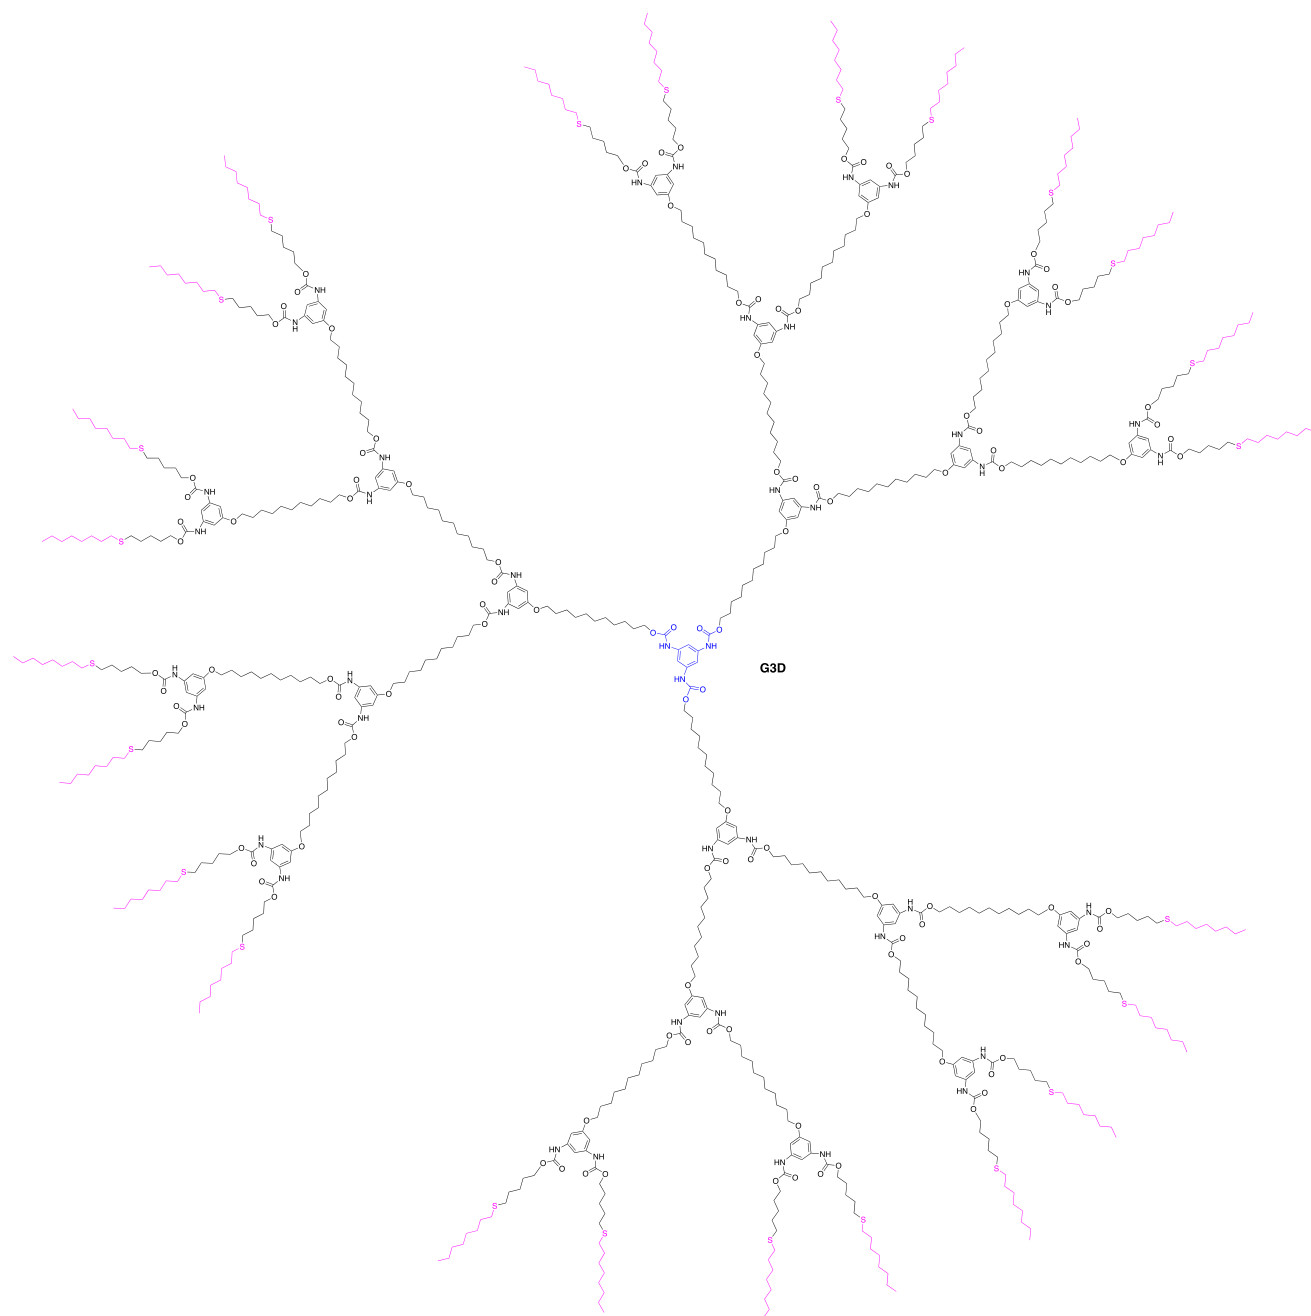

Figure S4. Expanded structure of thiol-ene functionalized **G3D**.

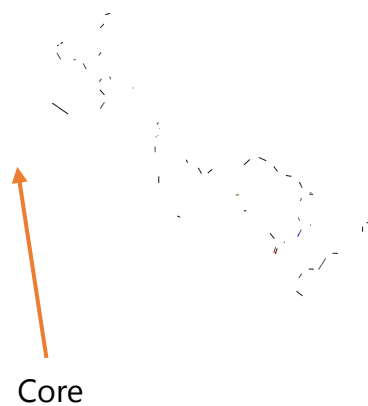

Figure S5. Optimized geometry (with the hydrogen atoms removed) of thiol-ene functionalized **G3D** showing 3D ball and stick model ( $E = 1735.4$  kJ/mol at 298 K). Red = oxygen atom, blue = nitrogen atom, yellow = sulfur atom.

## 2. Copies of $^1\text{H}$ , $^{13}\text{C}$ NMR, and 2D spectra of G2 – G3 dendrons and dendrimers

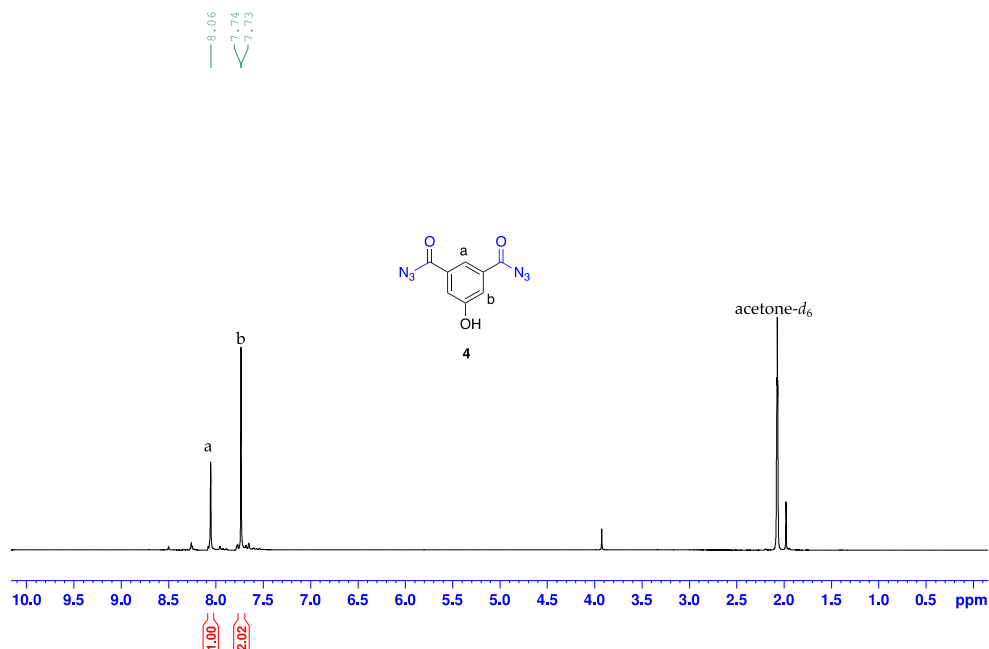

Figure S6.  $^1\text{H}$  NMR spectrum (500 MHz,  $\text{CD}_3\text{COCD}_3$ , 298 K) of 5-hydroxy-1,3-benzenedicarbonyl diazide **4**.

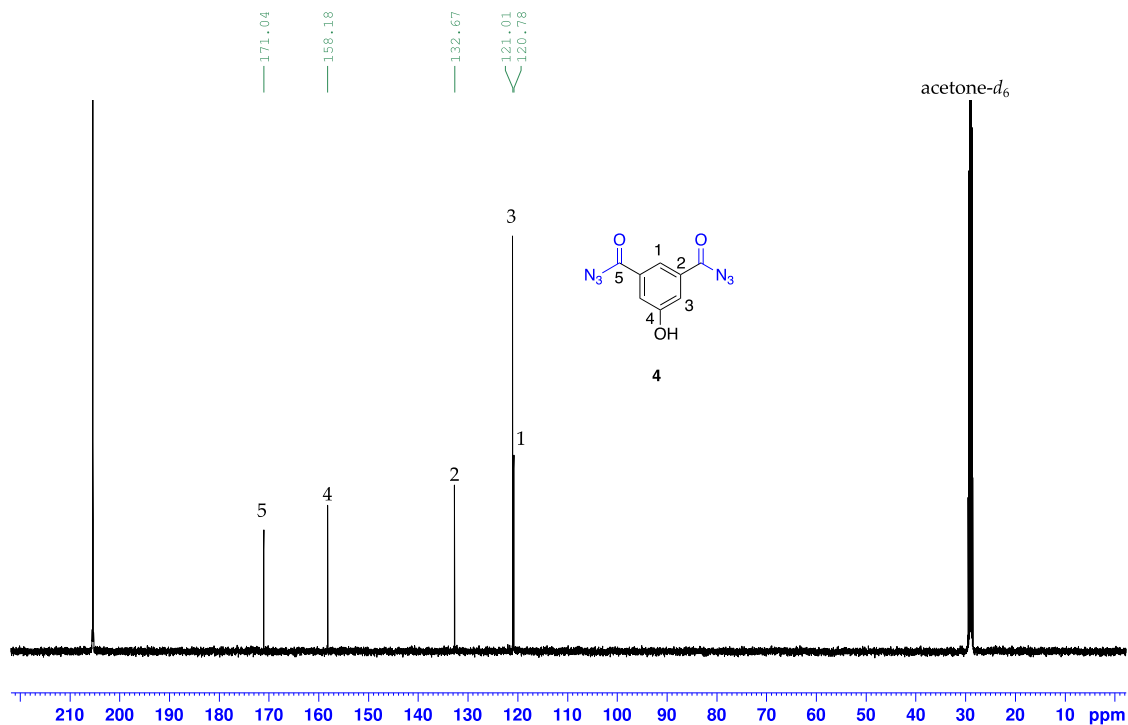

Figure S7.  $^{13}\text{C}$  NMR spectrum (126 MHz,  $\text{CD}_3\text{COCD}_3$ , 298 K) of 5-hydroxy-1,3-benzenedicarbonyl diazide **4**.



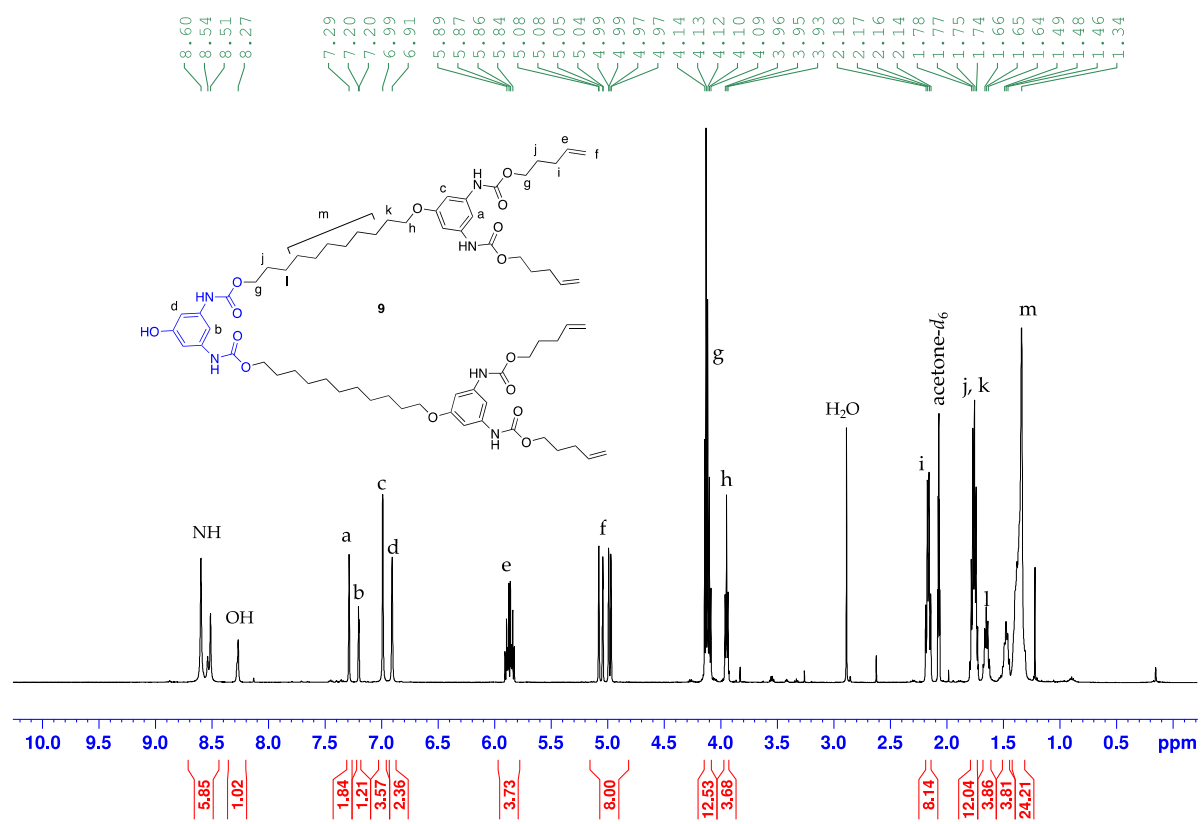

Figure S8.  $^1\text{H}$  NMR spectrum (500 MHz,  $\text{CD}_3\text{COCD}_3$ , 298 K) of G2 phenolic wedge **9**.

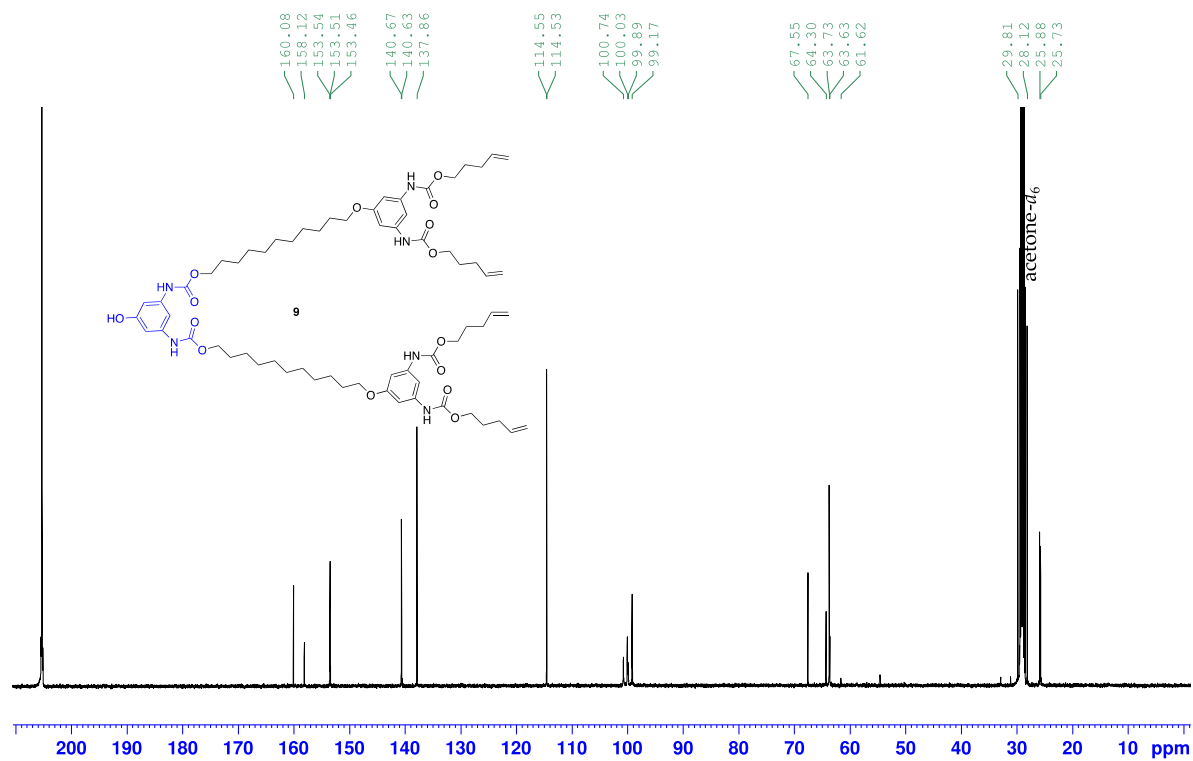

Figure S9.  $^{13}\text{C}$  NMR spectrum (126 MHz,  $\text{CD}_3\text{COCD}_3$ , 298 K) of G2 phenolic wedge **9**.

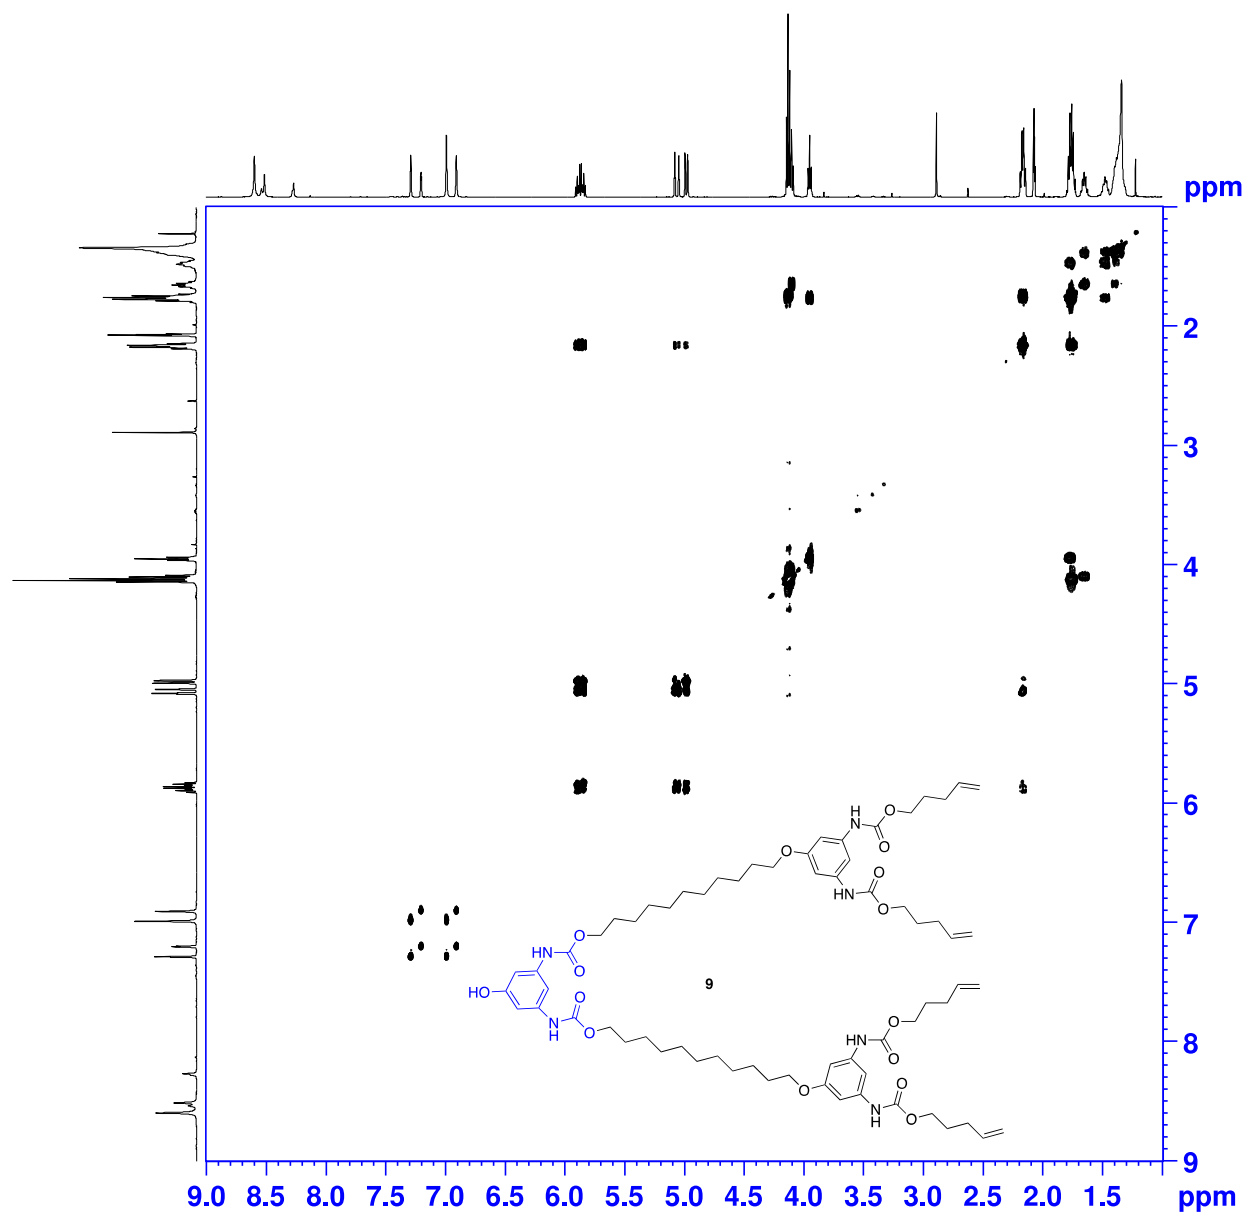

Figure S10.  $^1\text{H}$ - $^1\text{H}$  COSY spectrum (500 MHz,  $\text{CD}_3\text{COCD}_3$ , 298 K) of G2 phenolic wedge 9.

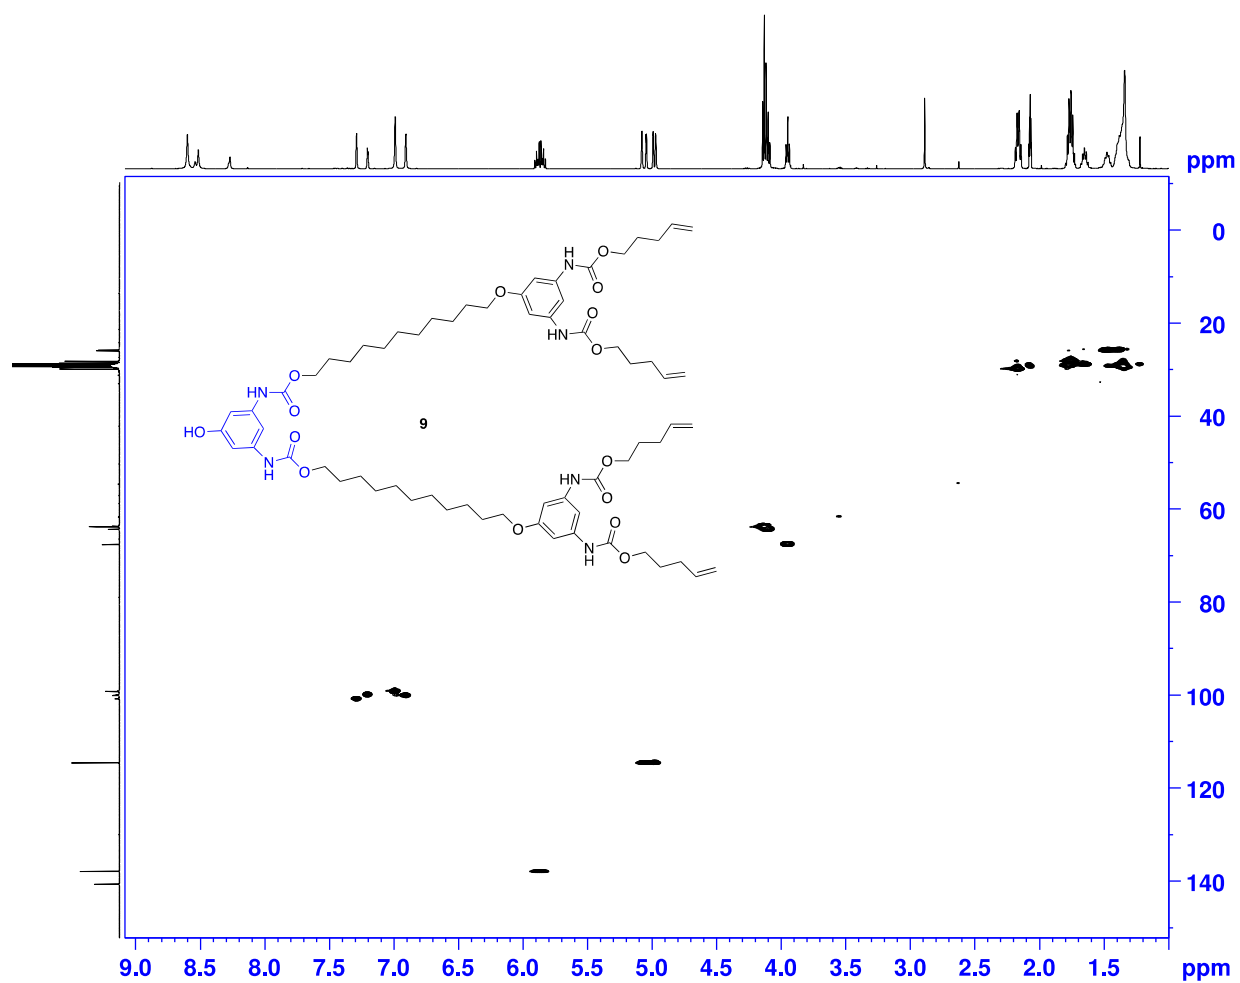

Figure S11. HSQC ( $^1\text{H}$ - $^{13}\text{C}$ ) spectrum (500 MHz,  $\text{CD}_3\text{COCD}_3$ , 298 K) of G2 phenolic wedge **9**.

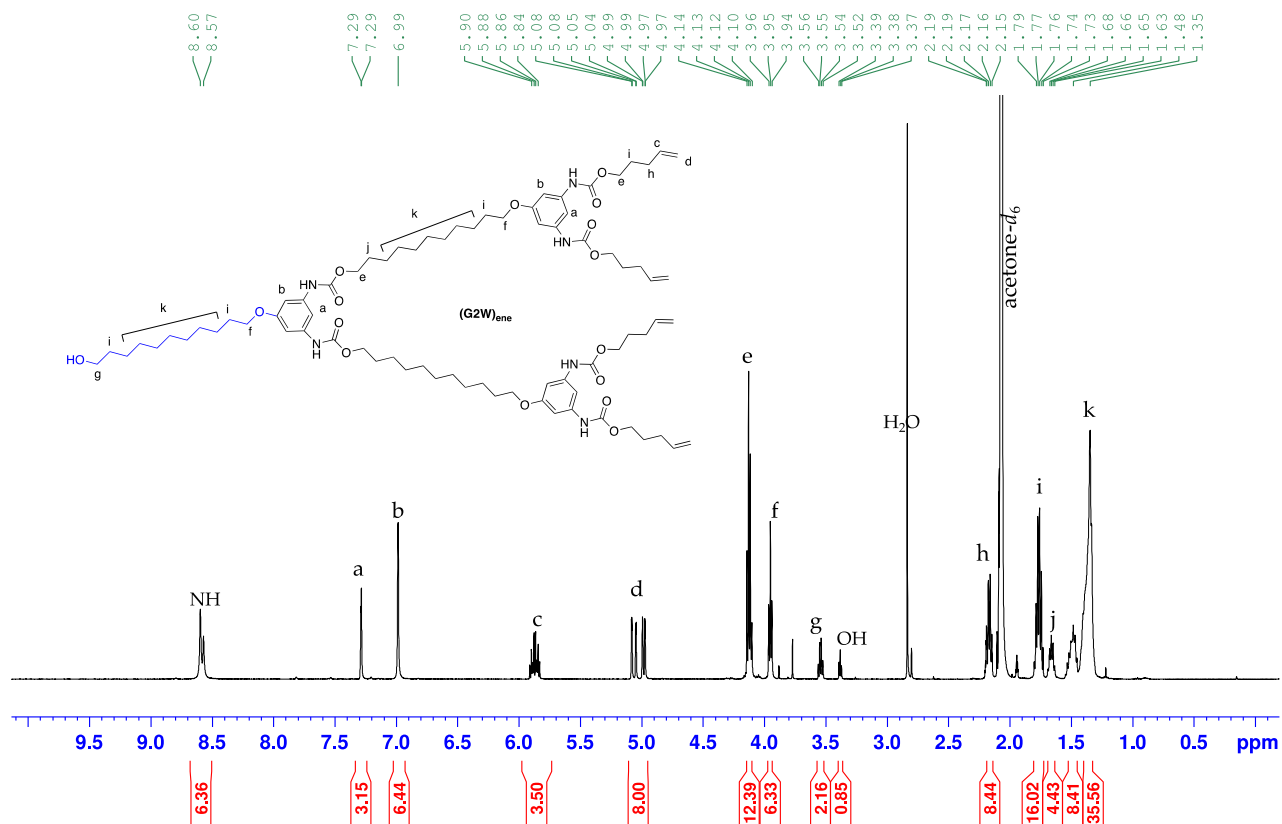

Figure S12. <sup>1</sup>H NMR spectrum (500 MHz, CD<sub>3</sub>COCD<sub>3</sub>, 298 K) of **(G2W)<sub>ene</sub>**.

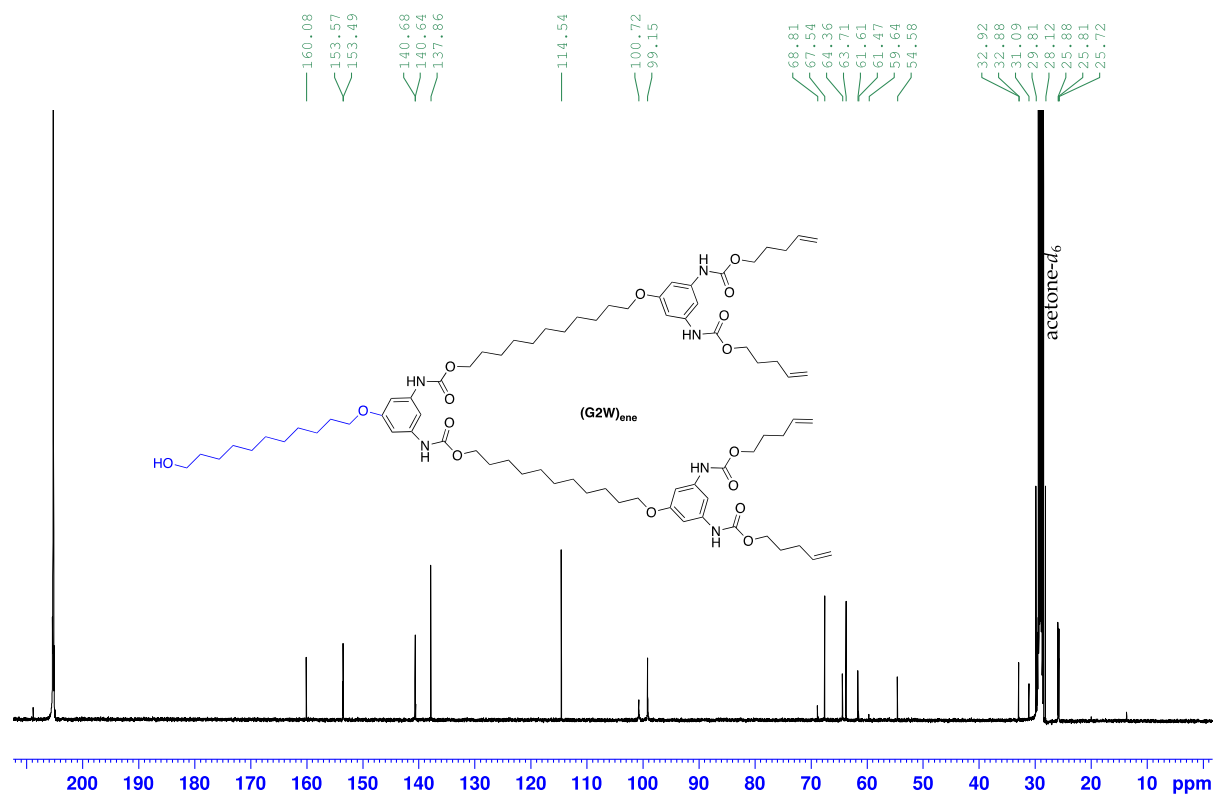

Figure S13. <sup>13</sup>C NMR spectrum (126 MHz, CD<sub>3</sub>COCD<sub>3</sub>, 298 K) of **(G2W)<sub>ene</sub>**.

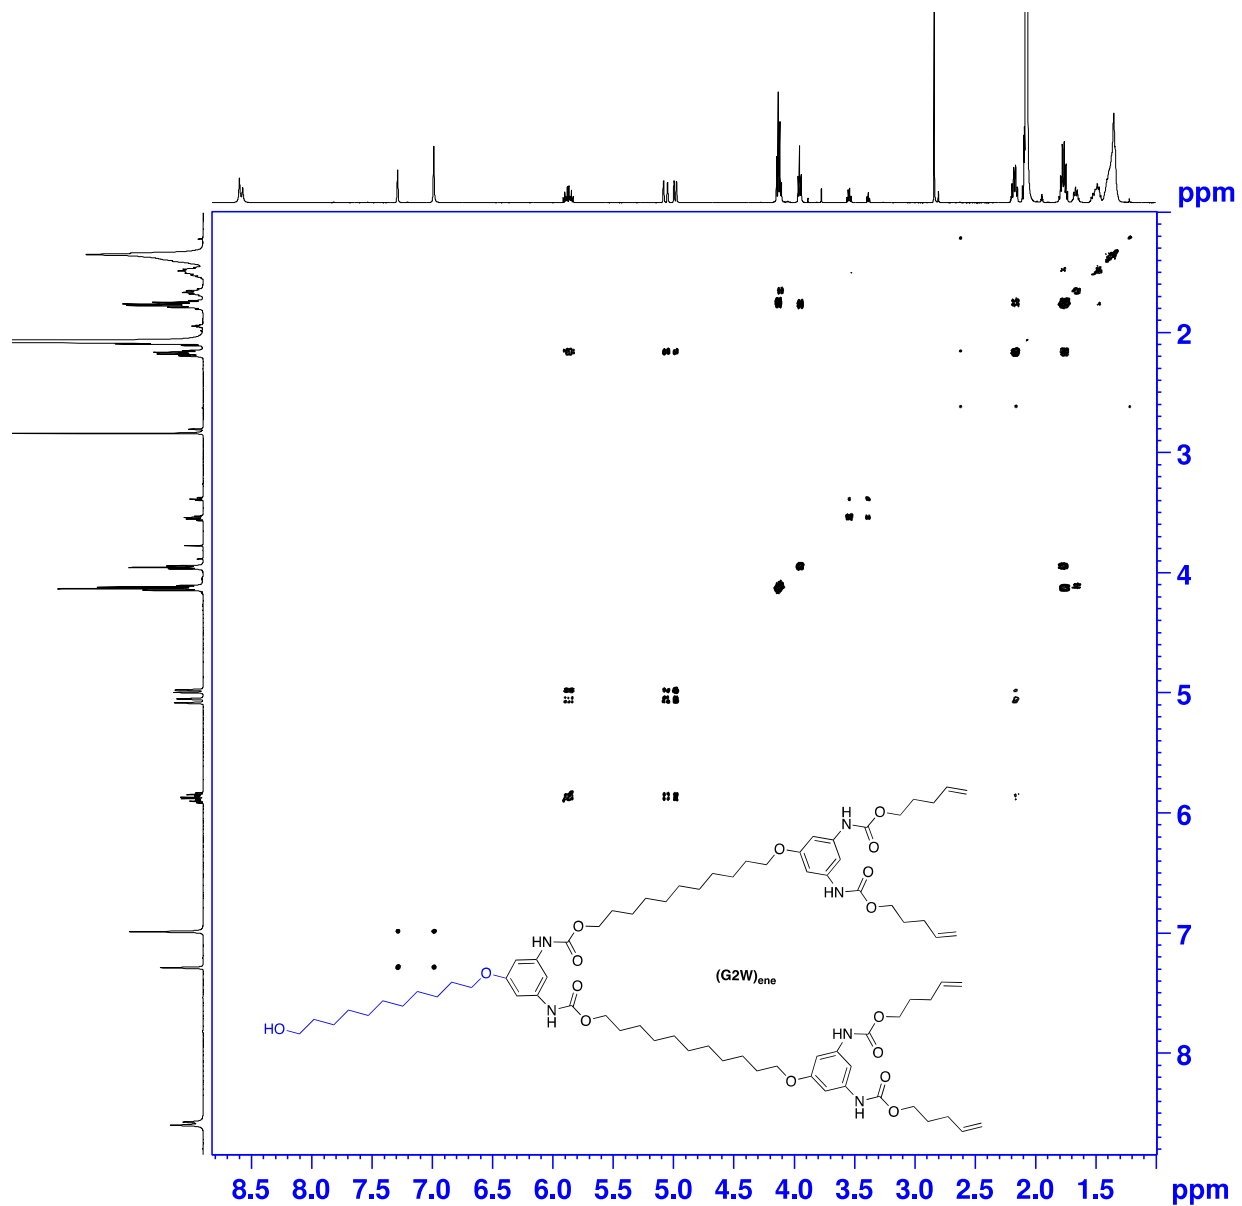

Figure S14. COSY ( $^1\text{H}$ - $^1\text{H}$ ) spectrum (500 MHz,  $\text{CD}_3\text{COCD}_3$ , 298 K) of **(G2W)<sub>ene</sub>**.

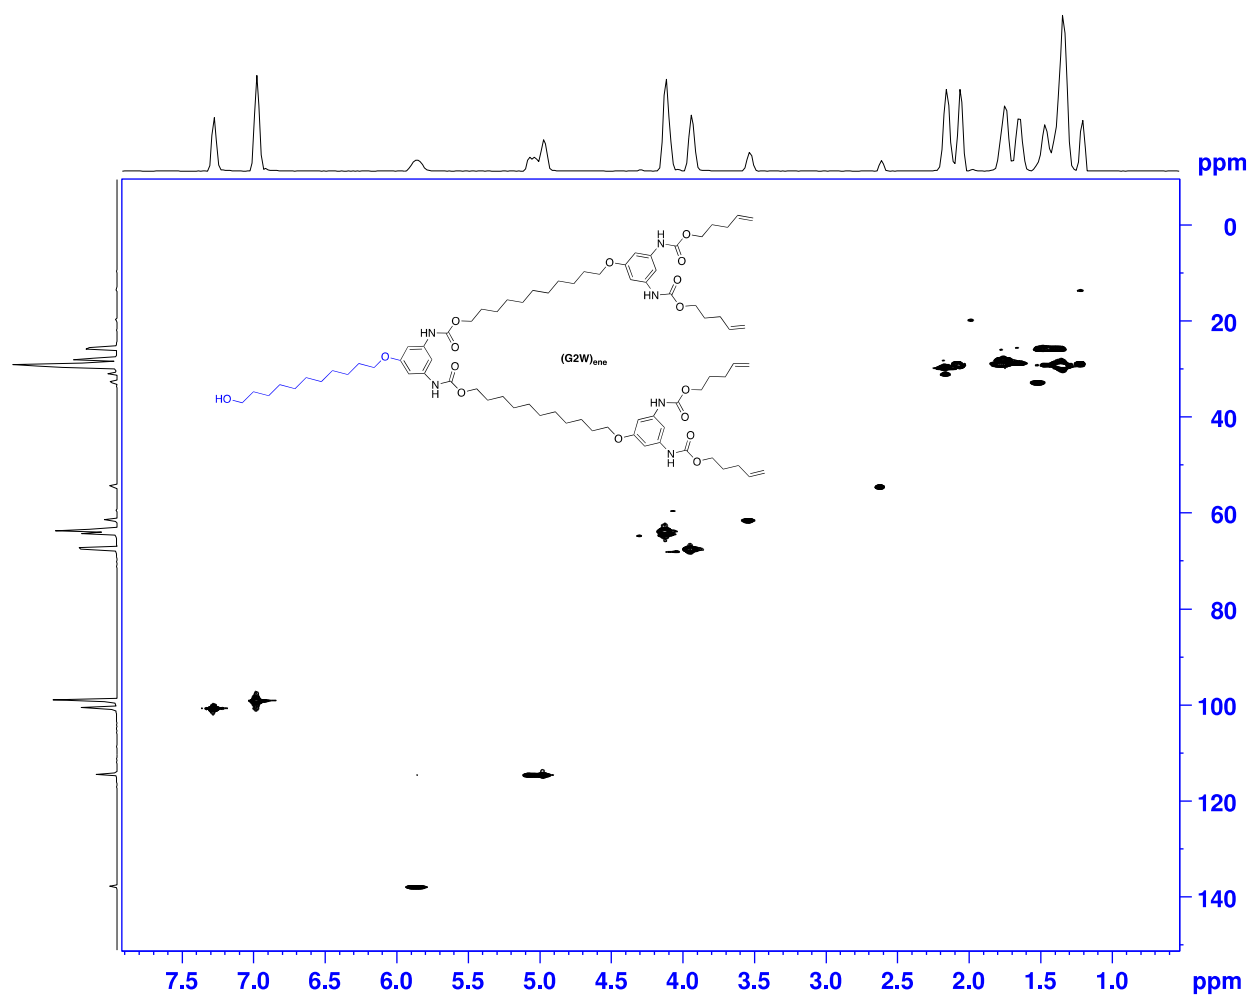

Figure S15. HSQC ( $^1\text{H}$ - $^{13}\text{C}$ ) spectrum (500 MHz,  $\text{CD}_3\text{COCD}_3$ , 298 K) of  $(G2W)_{ene}$ .



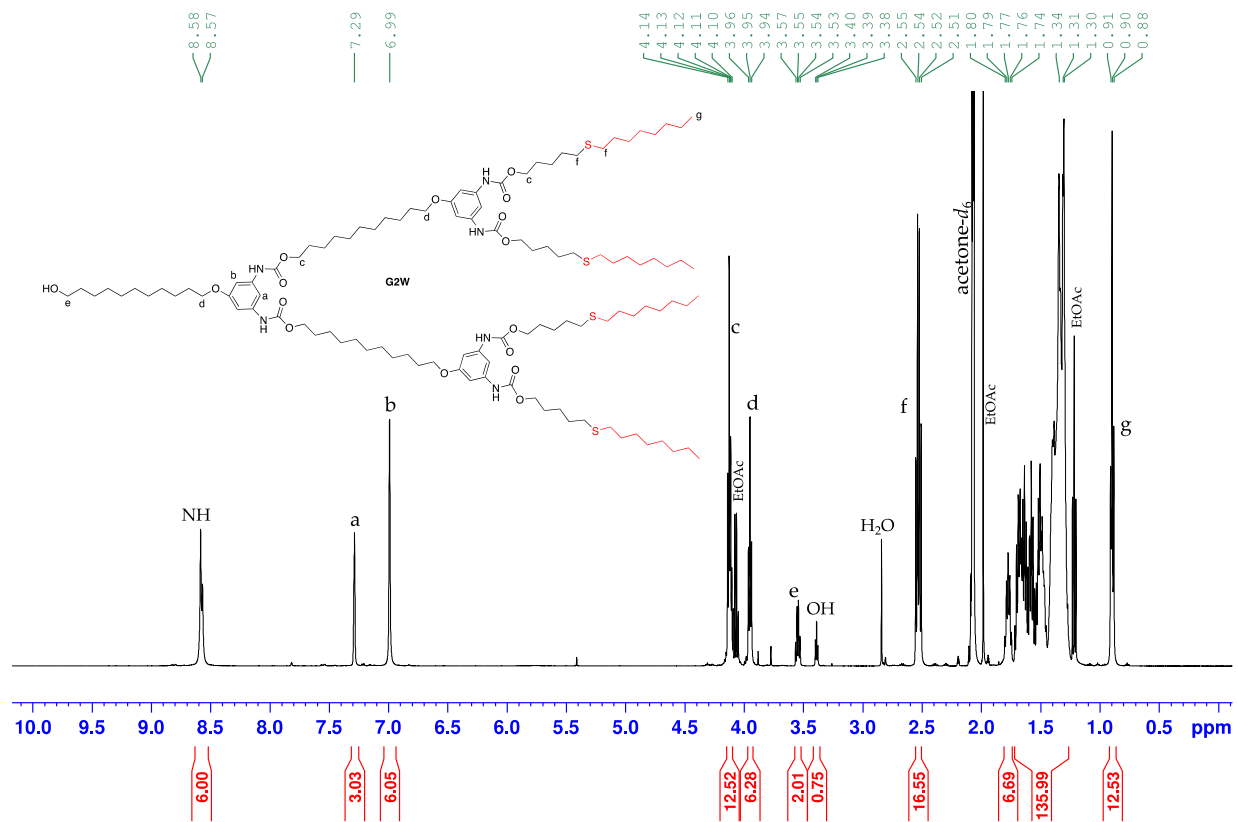

Figure S16. <sup>1</sup>H NMR spectrum (500 MHz, CD<sub>3</sub>COCD<sub>3</sub>, 298 K) of **G2W**.

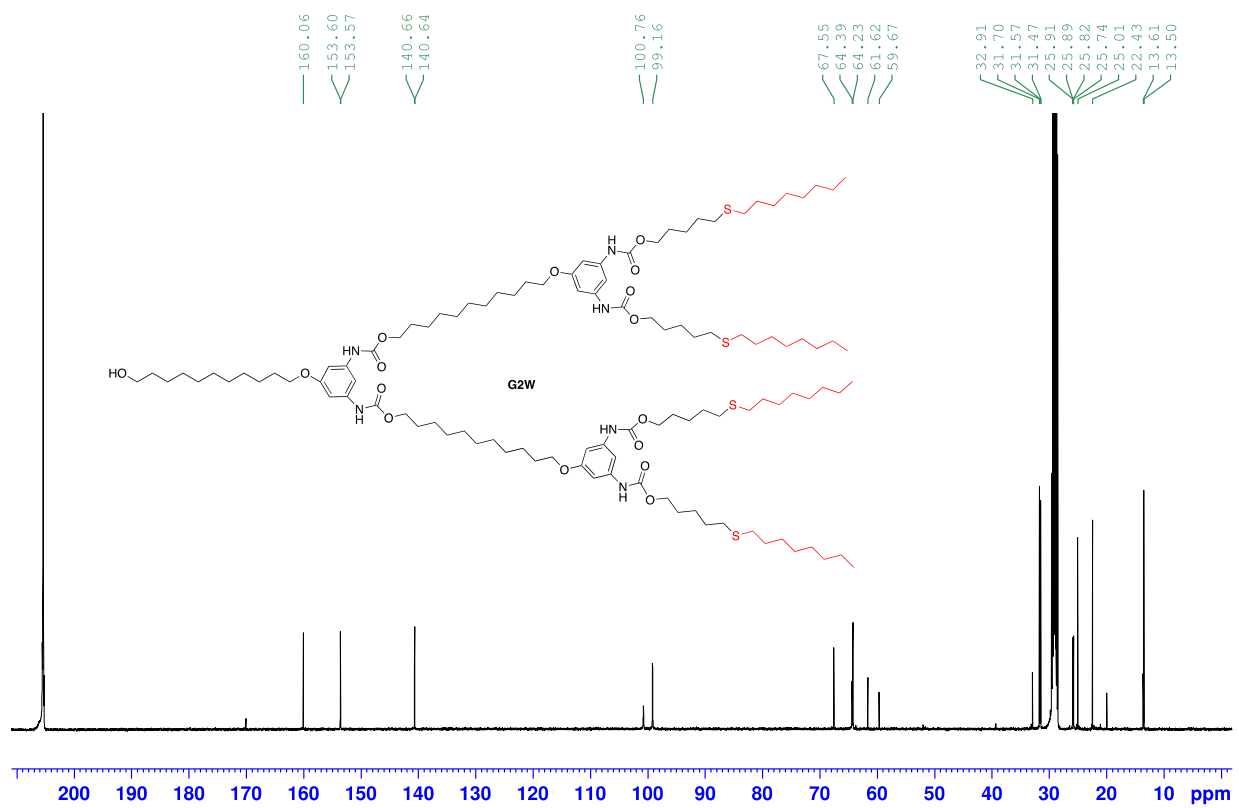

Figure S17. <sup>13</sup>C NMR spectrum (126 MHz, CD<sub>3</sub>COCD<sub>3</sub>, 298 K) of **G2W**.

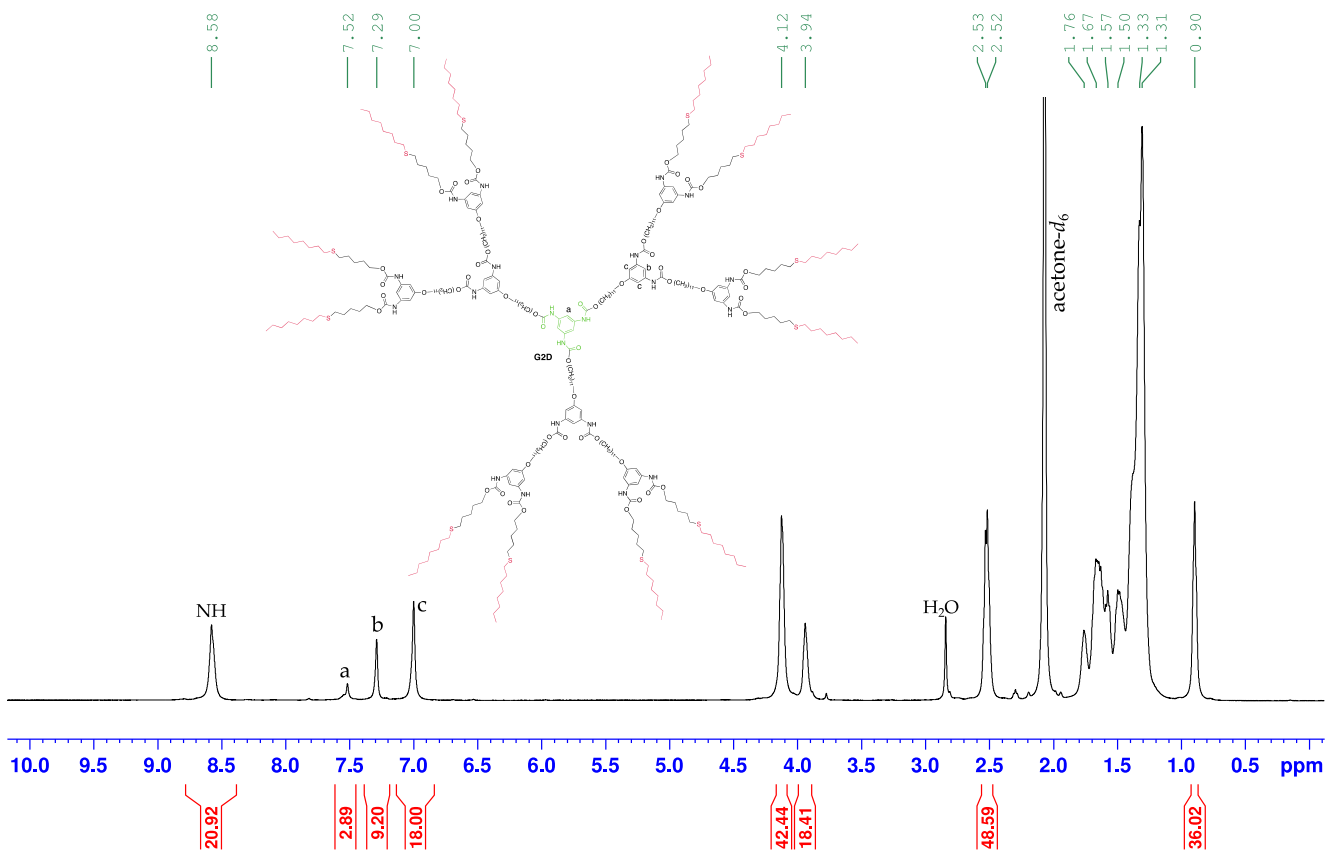

Figure S18. <sup>1</sup>H NMR spectrum (500 MHz, CD<sub>3</sub>COCD<sub>3</sub>, 298 K) of **G2D**.

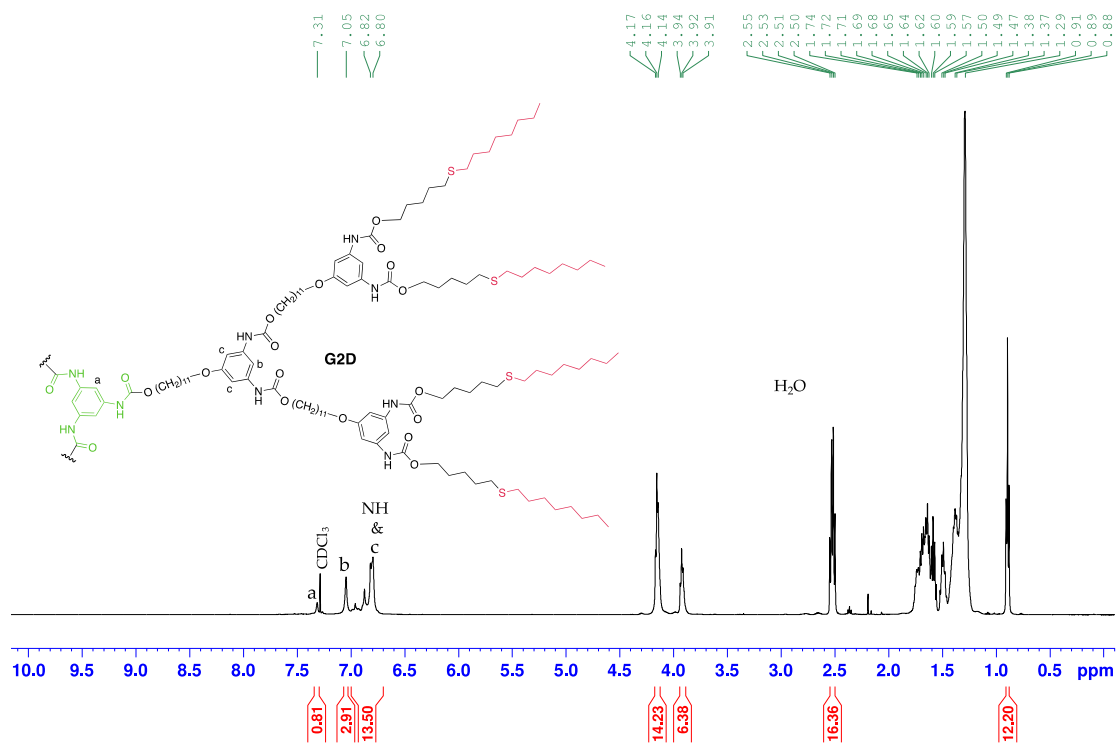

Figure S19. <sup>1</sup>H NMR spectrum (500 MHz, CDCl<sub>3</sub>, 298 K) of **G2D**.

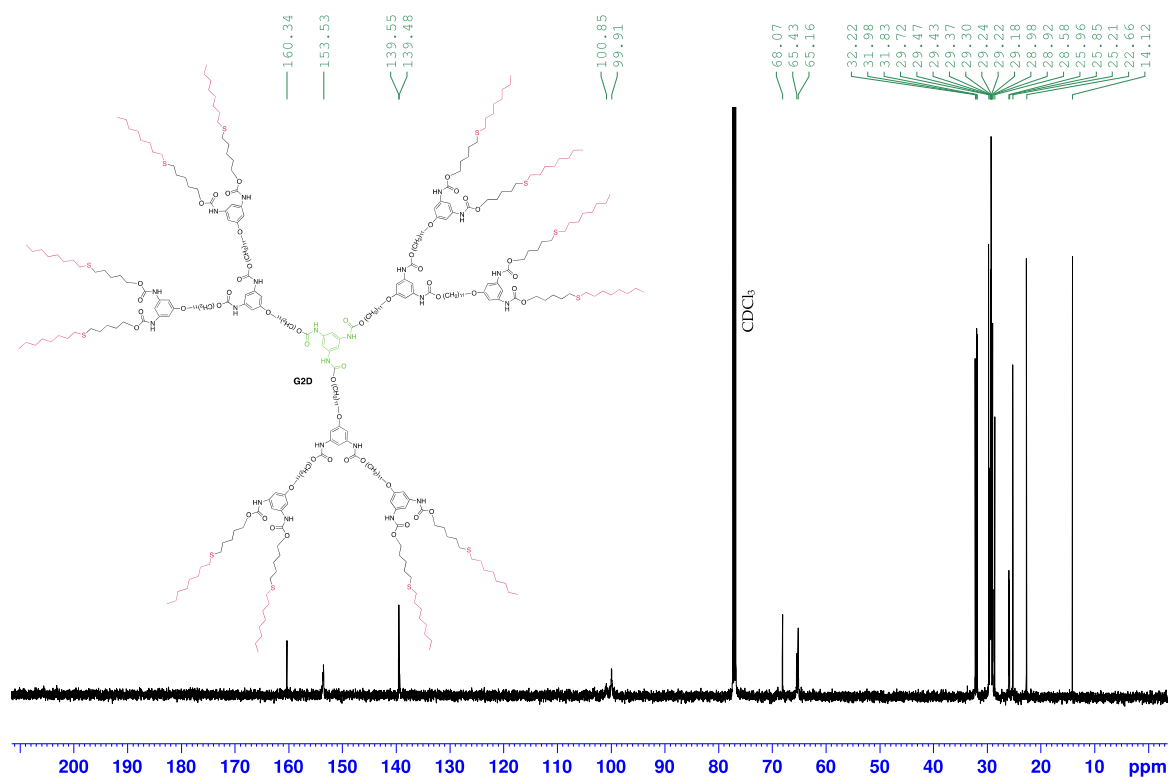

Figure S20.  $^{13}\text{C}$  NMR spectrum (126 MHz,  $\text{CDCl}_3$ , 298 K) of **G2D**.

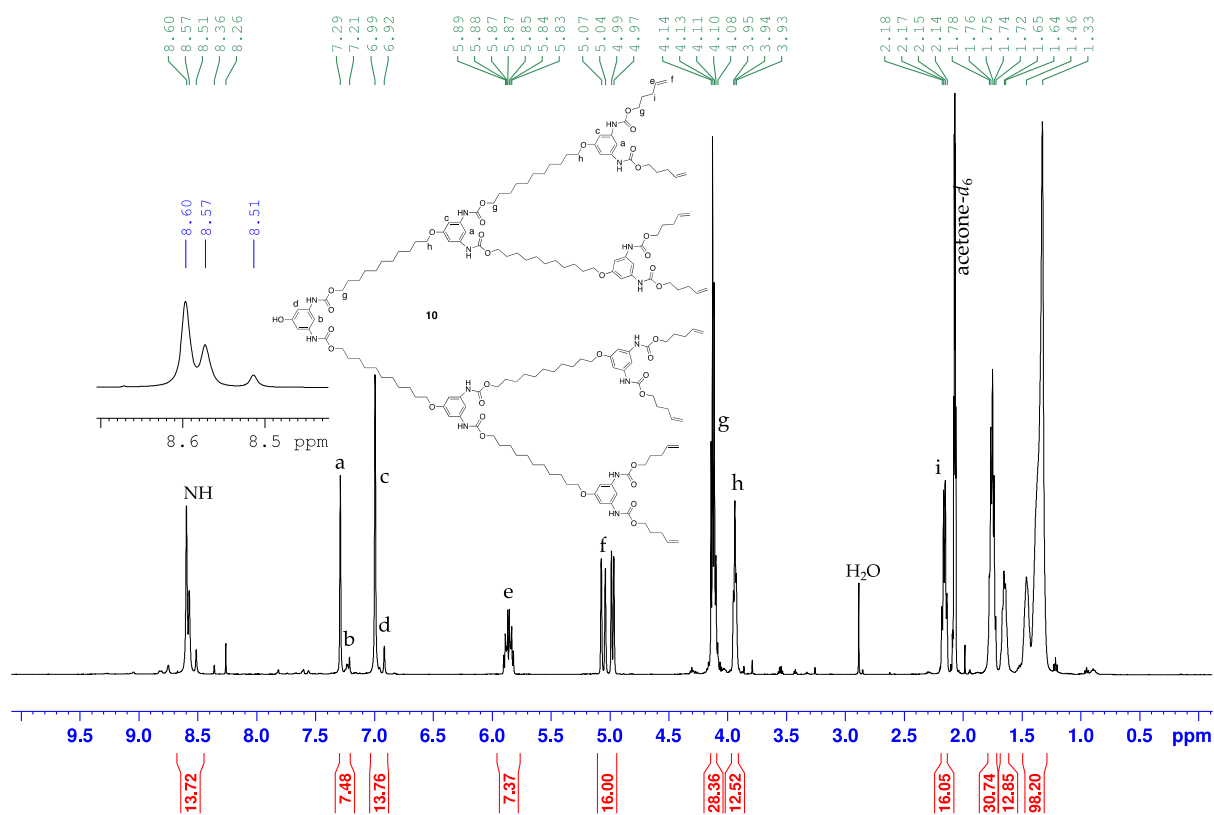

Figure S21.  $^1\text{H}$  NMR spectrum (500 MHz,  $\text{CD}_3\text{COCD}_3$ , 298 K) of G3 phenolic wedge **10**.

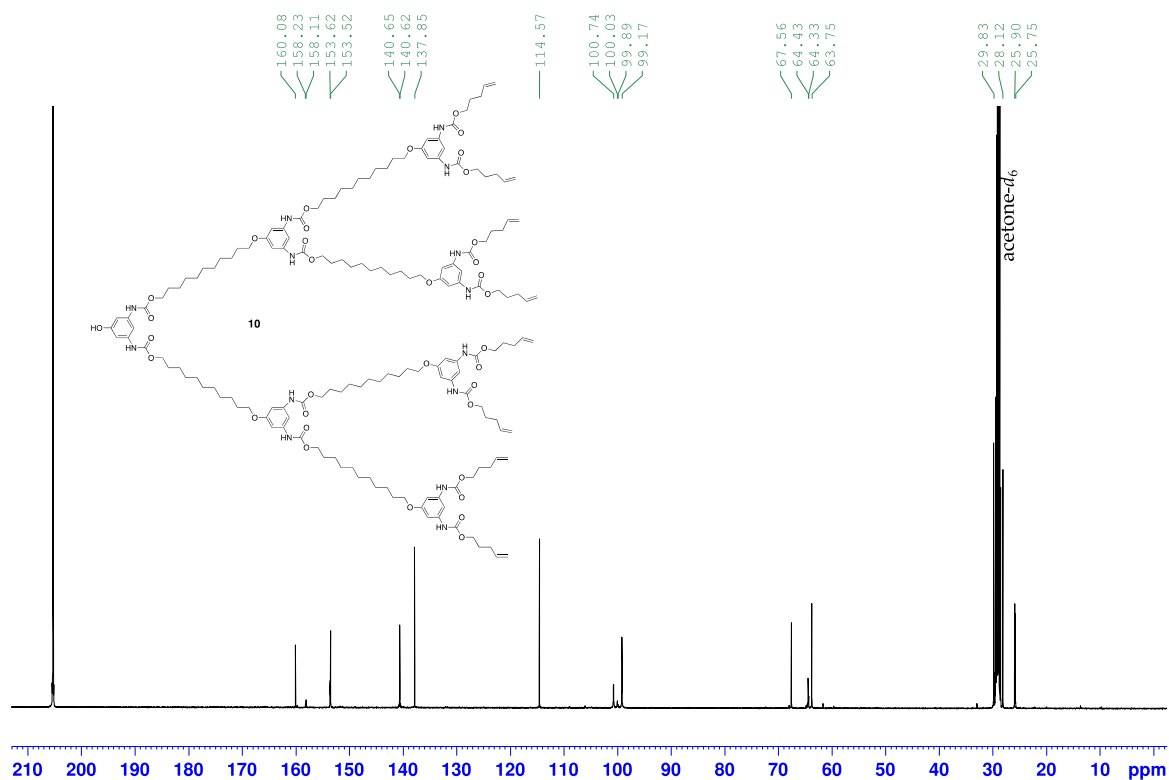

Figure S22. <sup>13</sup>C NMR spectrum (126 MHz, CD<sub>3</sub>COCD<sub>3</sub>, 298 K) of G3 phenolic wedge **10**.

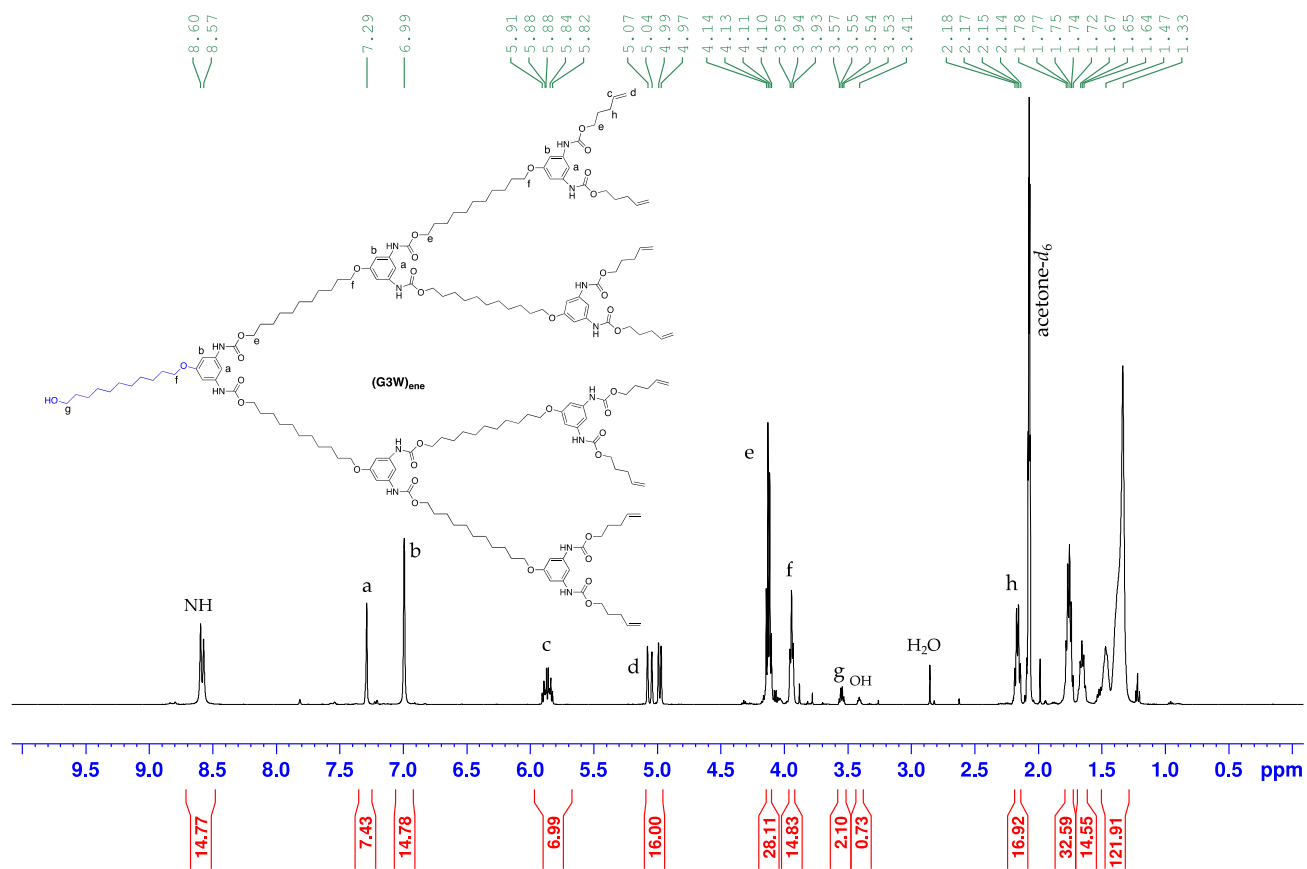

Figure S23. <sup>1</sup>H NMR spectrum (500 MHz, CD<sub>3</sub>COCD<sub>3</sub>, 298 K) of **(G3W)<sub>ene</sub>**.



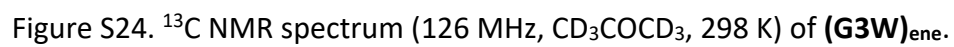

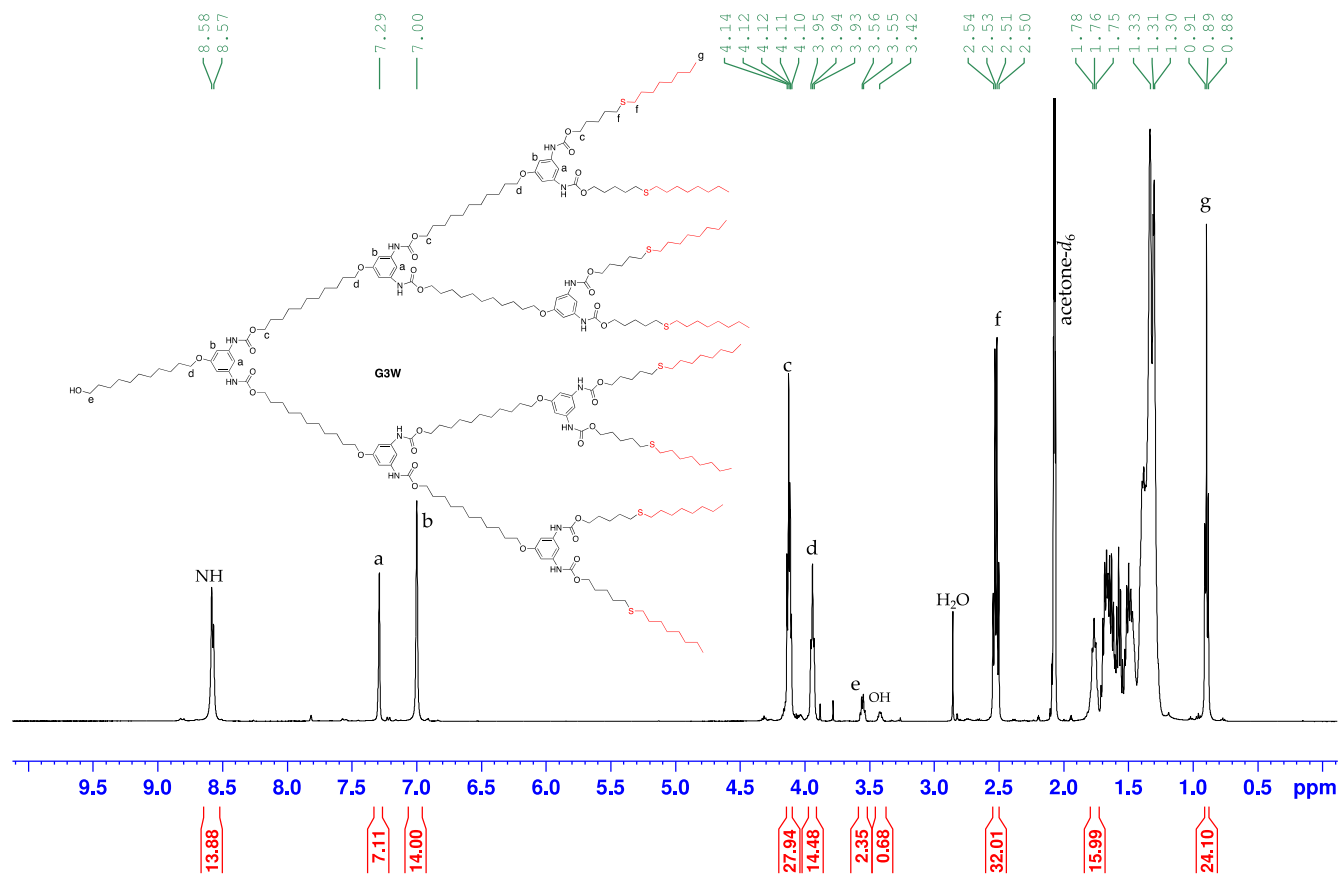

Figure S25.  $^1\text{H}$  NMR spectrum (500 MHz,  $\text{CD}_3\text{COCD}_3$ , 298 K) of **G3W**.

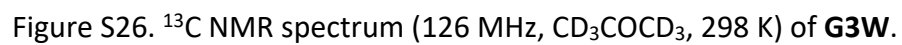

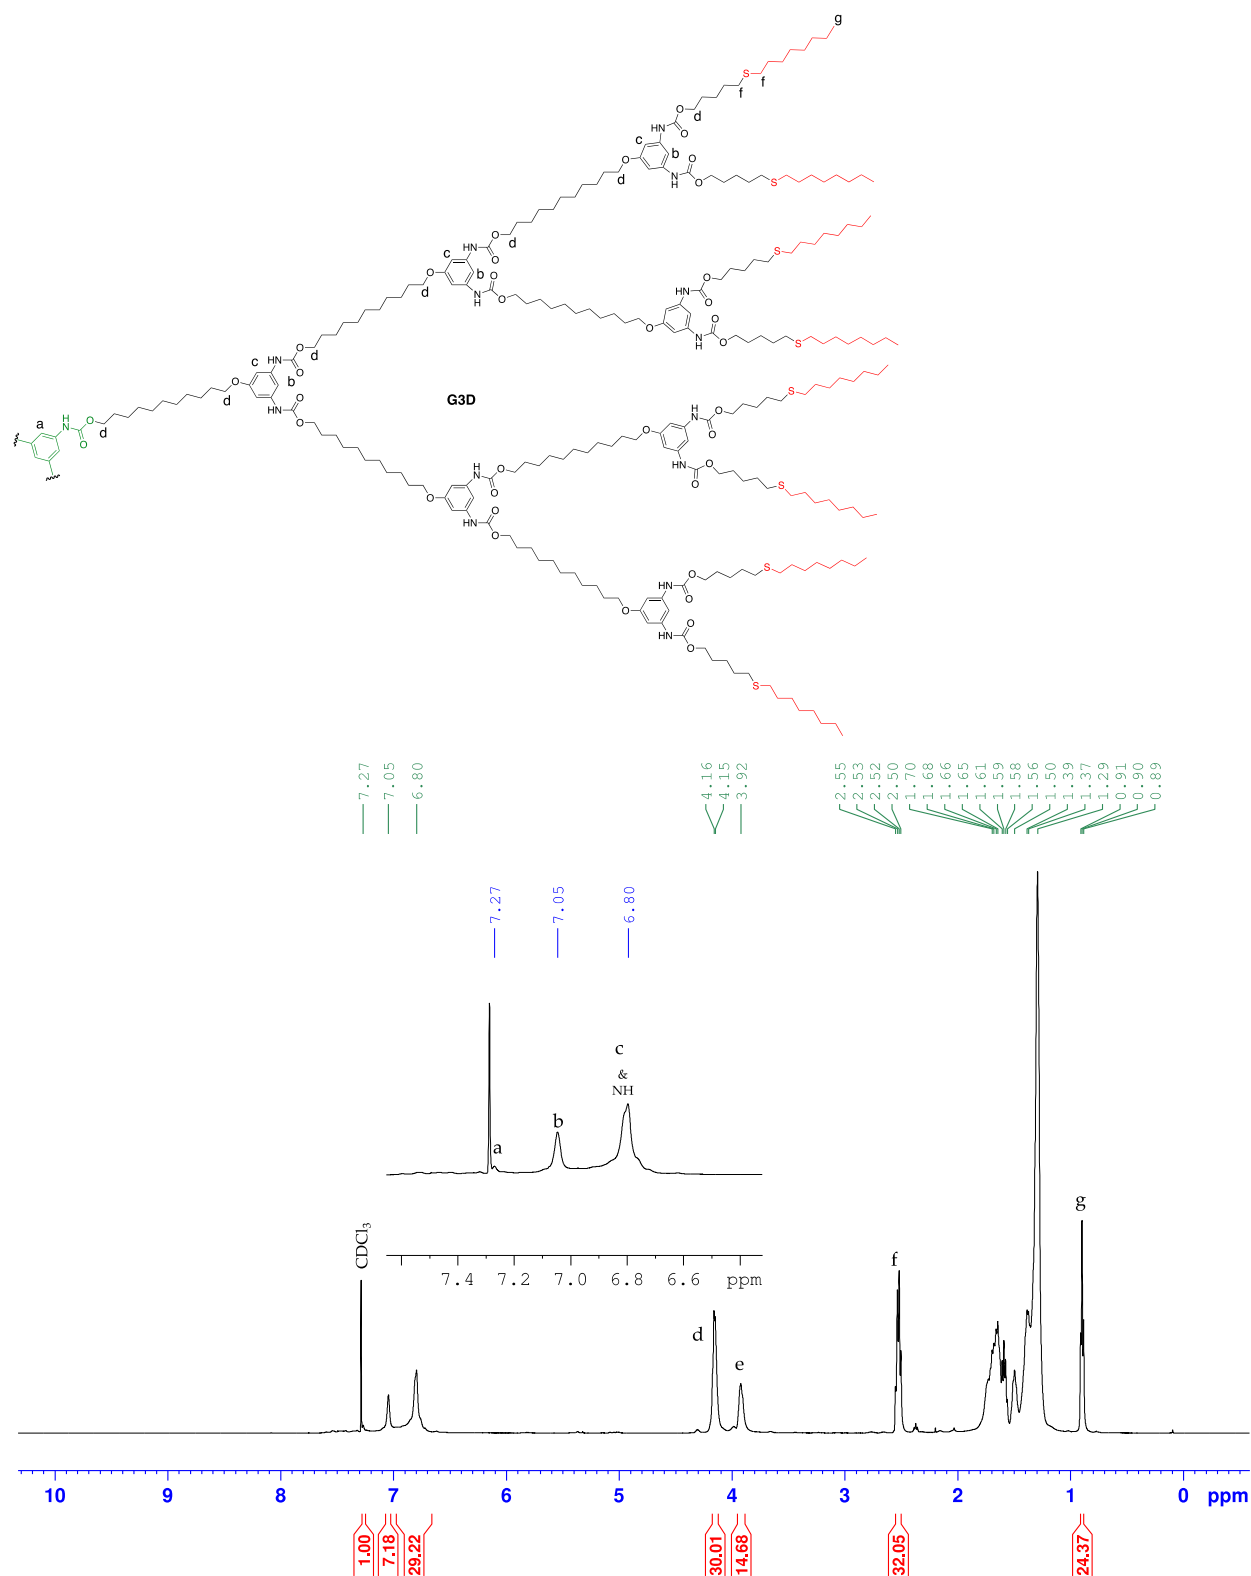

Figure S27.  $^1\text{H}$  NMR spectrum (500 MHz,  $\text{CDCl}_3$ , 298 K) of **G3D**. The aromatic region is expanded ( at the top).

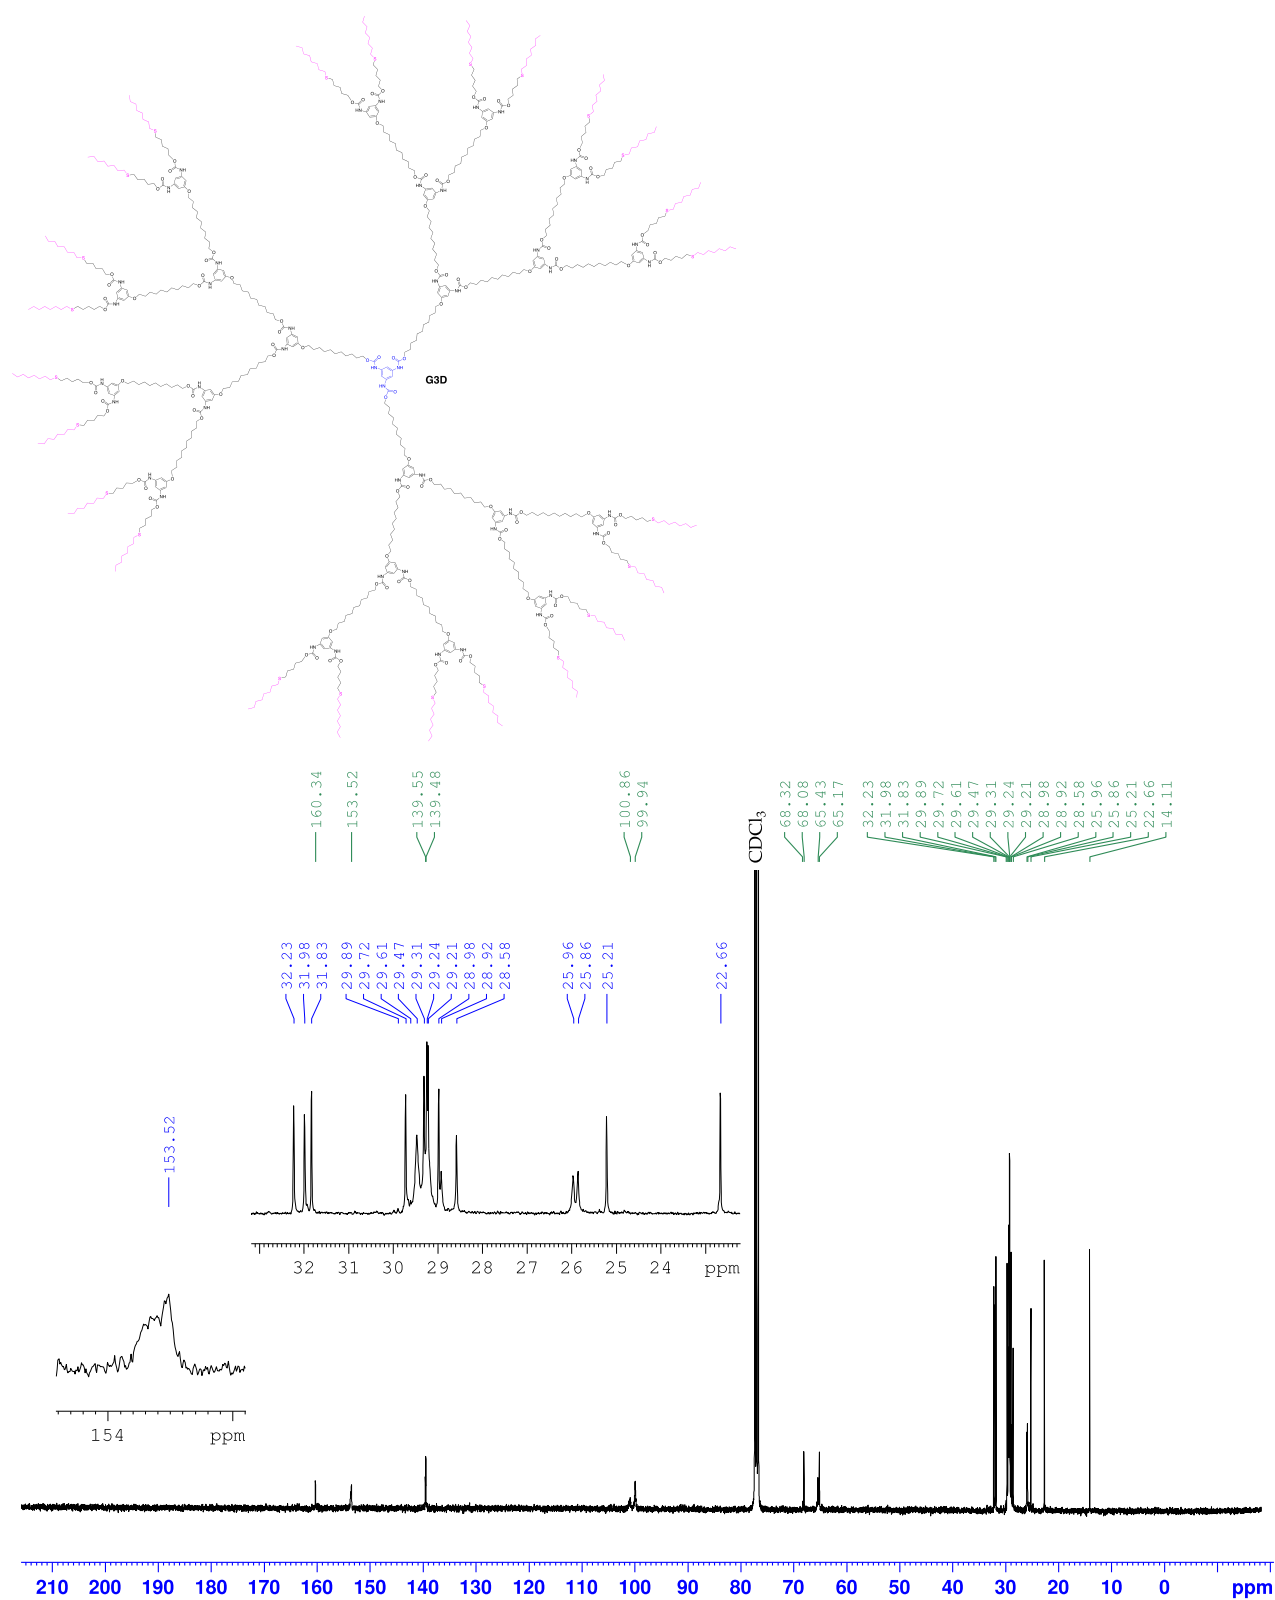

Figure S28.  $^{13}\text{C}$  NMR spectrum (126 MHz,  $\text{CDCl}_3$ , 298 K) of **G3D**.

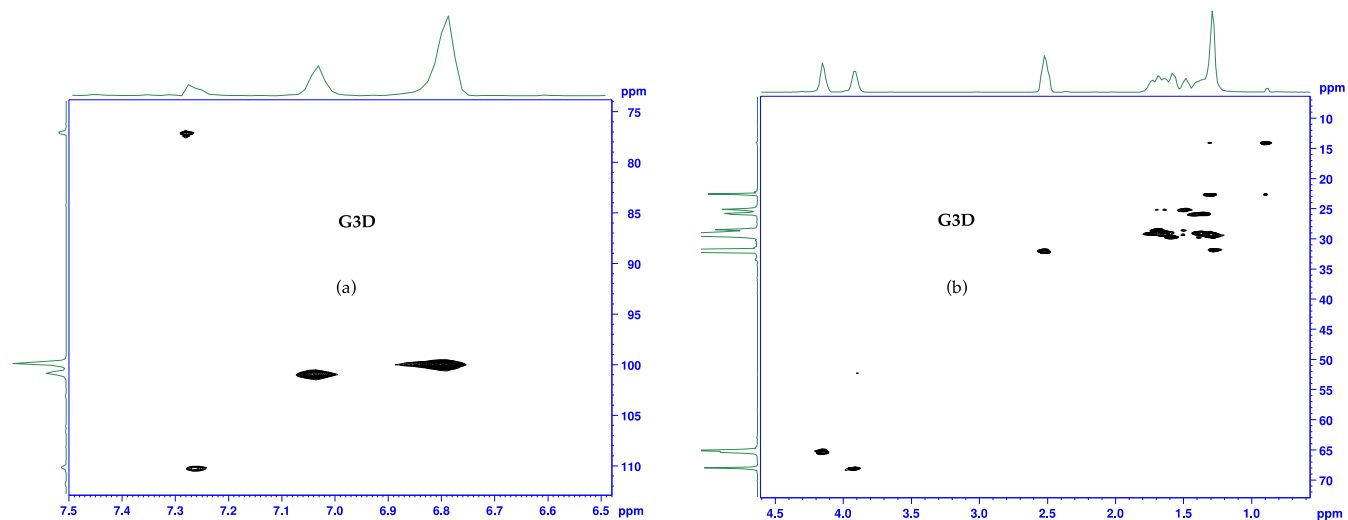

Figure S29. HSQC ( $^1\text{H}$ - $^{13}\text{C}$ ) spectrum (500 MHz,  $\text{CDCl}_3$ , 298 K) of **G3D** showing (a) the aromatic and (b) the aliphatic region.

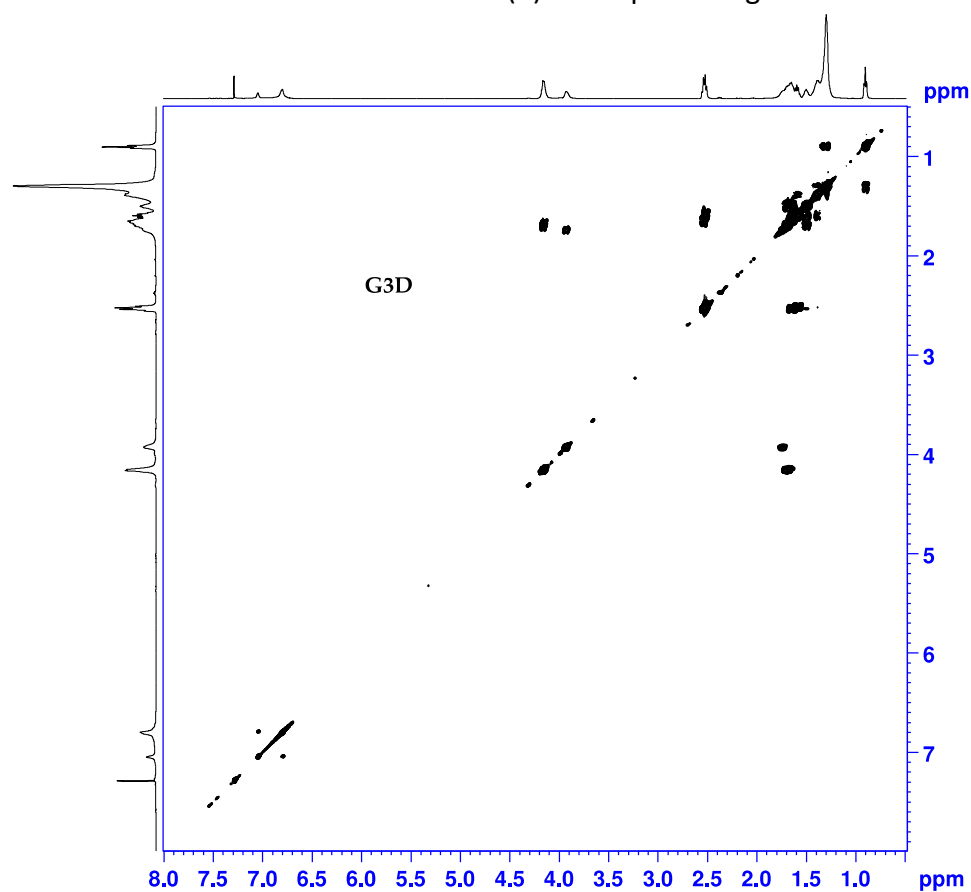

Figure S30. COSY ( $^1\text{H}$ - $^1\text{H}$ ) spectrum (500 MHz,  $\text{CDCl}_3$ , 298 K) of **G3D**.

### 3. 2D-Diffusion order experiment (DOSY) ( of G1 – G3 dendrimers

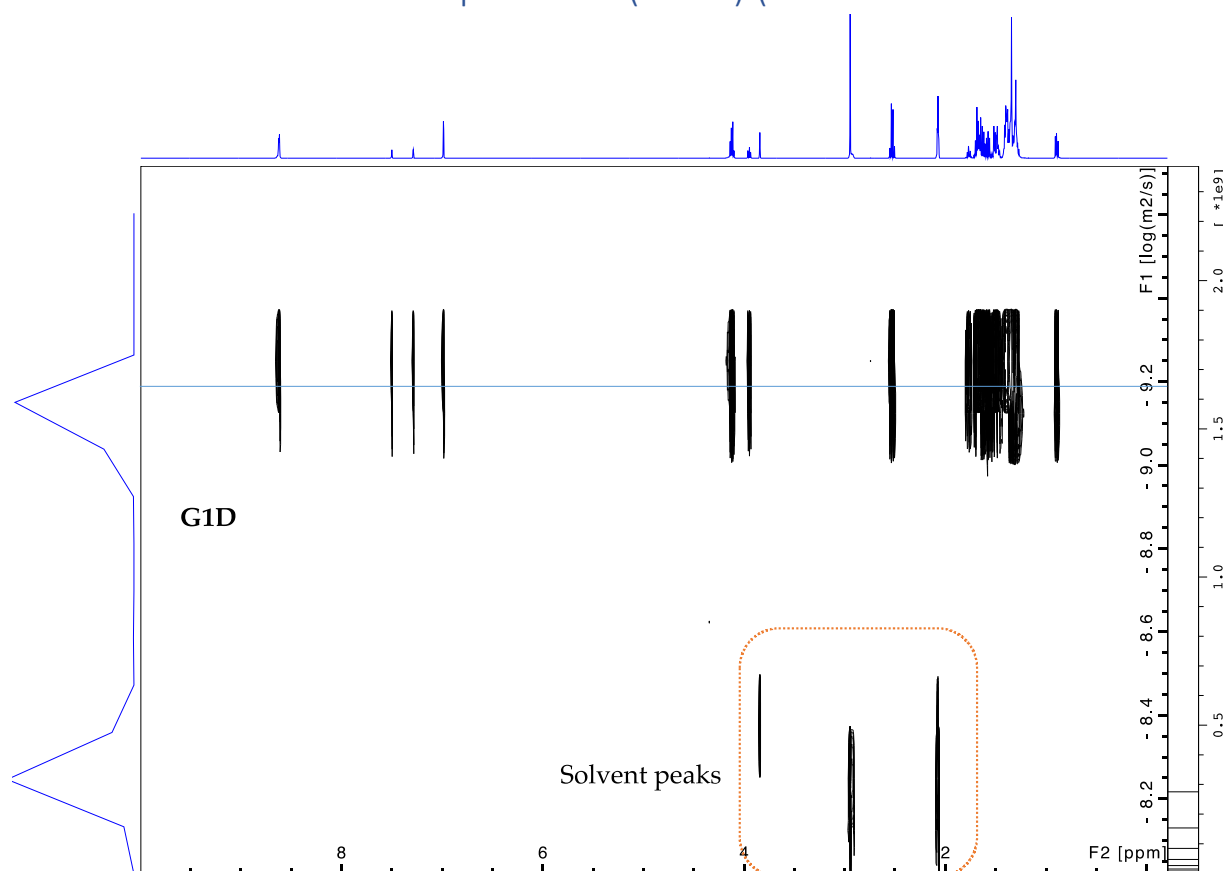

Figure S31. 2-D DOSY spectrum ( $CD_3COCD_3$ , 298 K, 500 MHz) of the surface functionalized generation-one dendrimer **G1D**, the diffusion coefficient  $D = 4.47 \times 10^{-10} m^2/s$ .

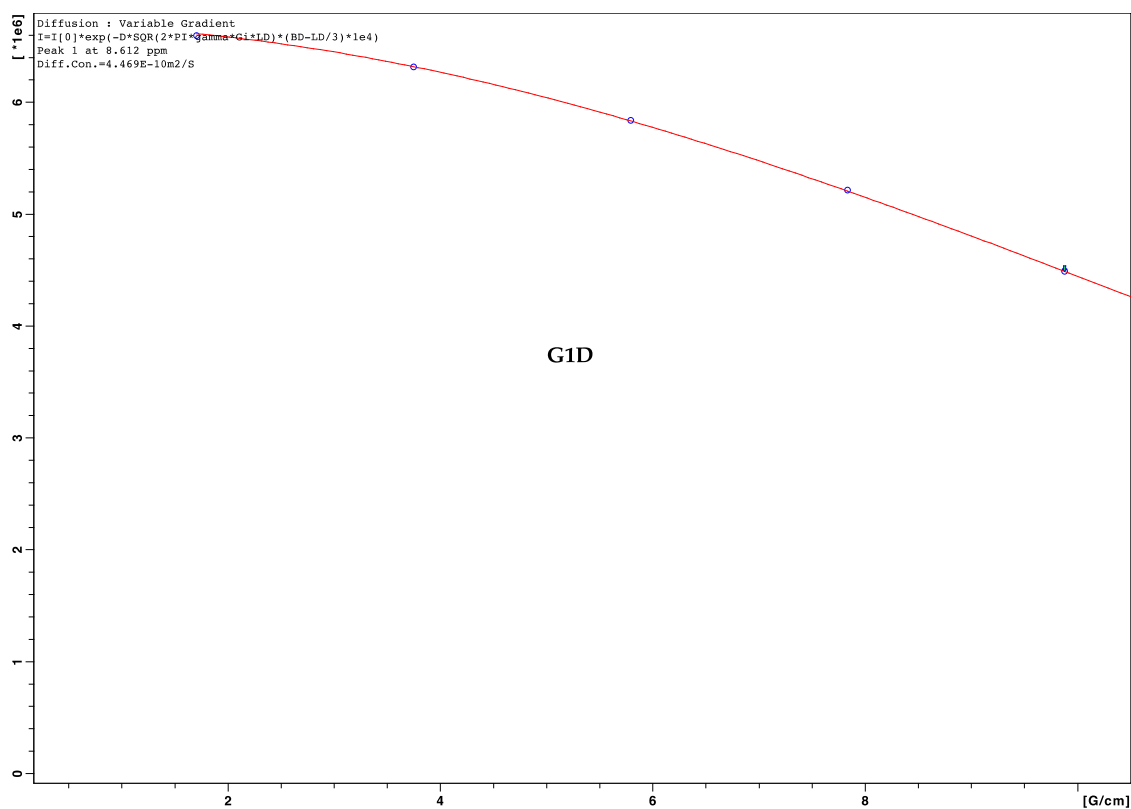

Figure S32. Showing fitting function after fitting with *SimFit* ( $T1/T2$ ) analysis. The fitting curve for the peak at 8.612 ppm of **G1D** (CD<sub>3</sub>COCD<sub>3</sub>, 298 K, 500 MHz) is shown.



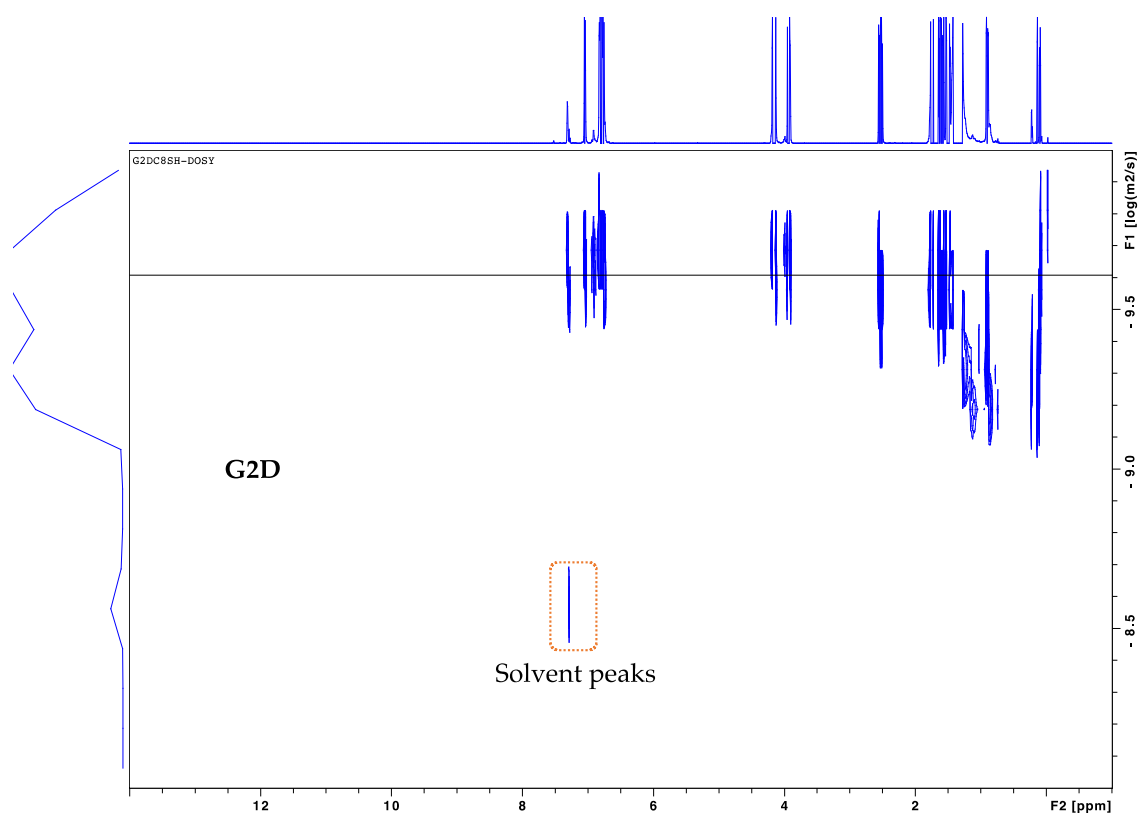

Figure S33. 2-D DOSY spectrum ( $CDCl_3$ , 298 K, 500 MHz) of the surface functionalized generation-two dendrimer **G2D**, the diffusion coefficient  $D = 1.857 \times 10^{-10} \text{ m}^2/\text{s}$ .

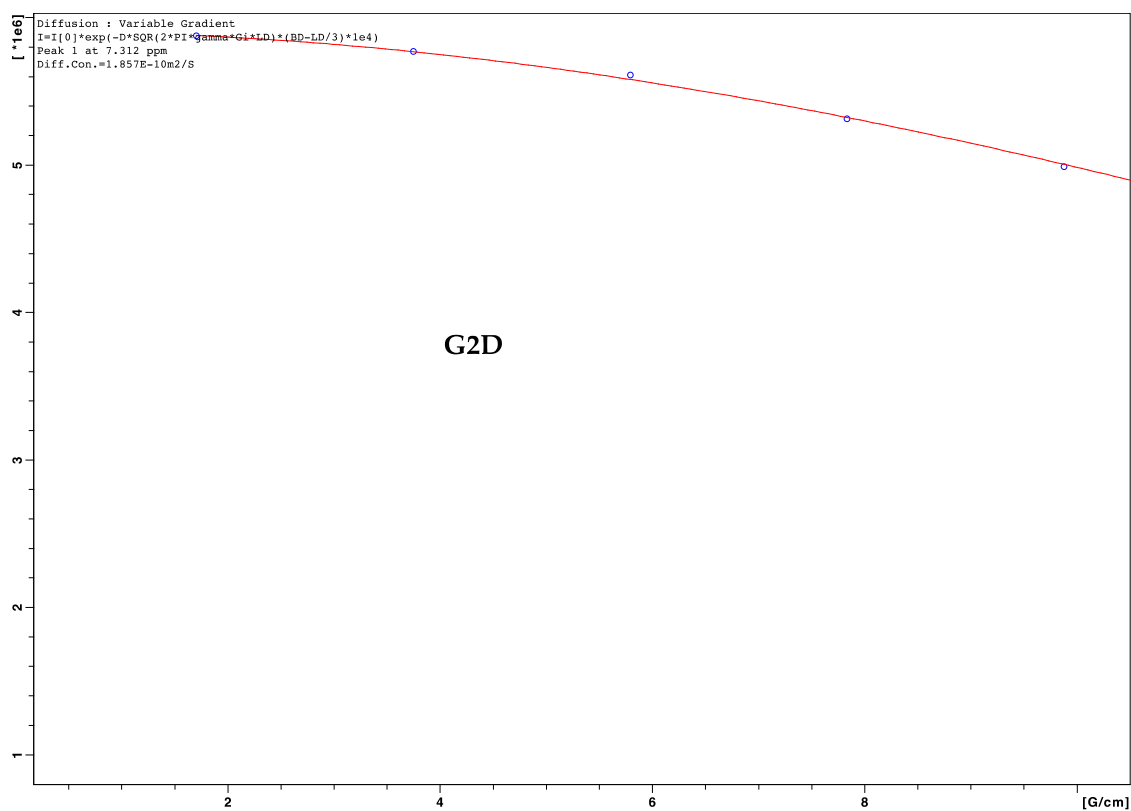

Figure S34. Showing fitting function after fitting with *SimFit* ( $T1/T2$ ) analysis. The fitting curve for the peak at 7.312 ppm of **G2D** (CDCl<sub>3</sub>, 298 K, 500 MHz) is shown.

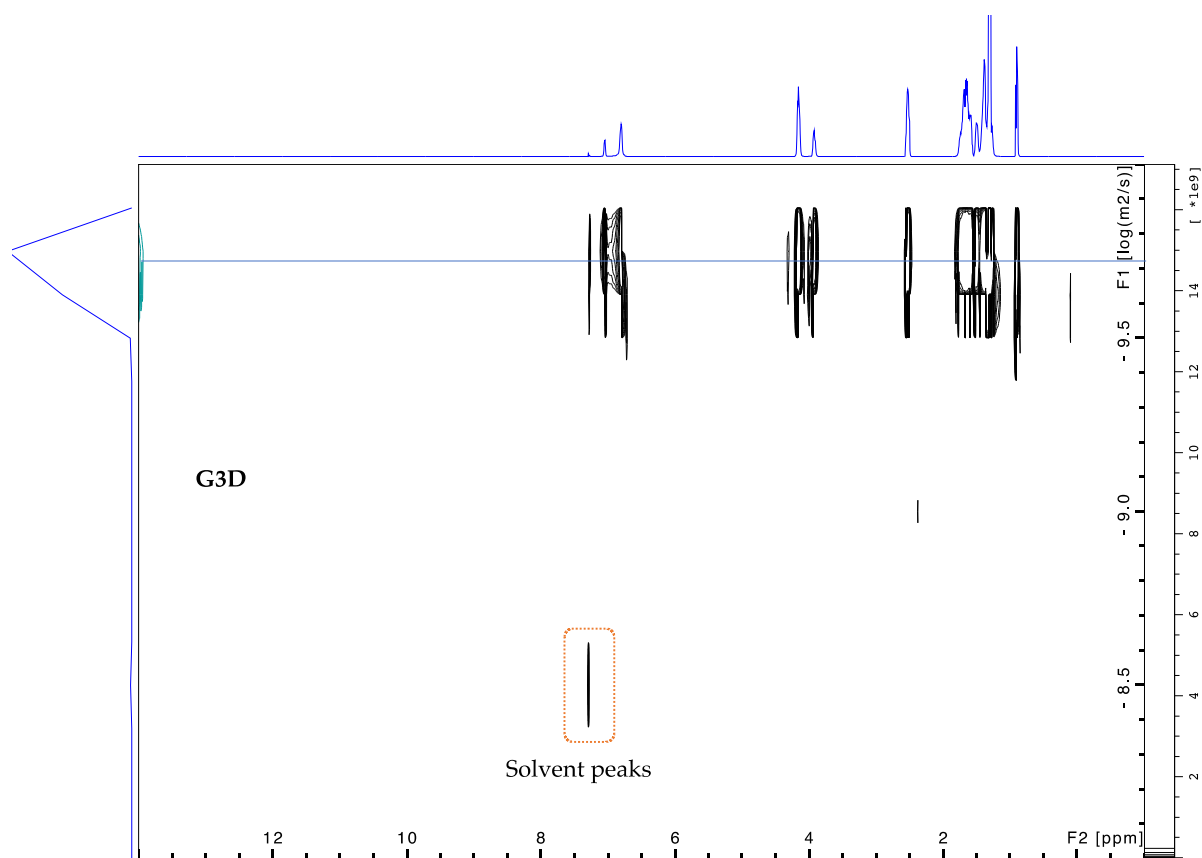

Figure S35. 2-D DOSY spectrum ( $\text{CDCl}_3$ , 298 K, 500 MHz) of the surface functionalized generation-two dendrimer **G3D**, the diffusion coefficient  $D = 1.381 \times 10^{-10} \text{ m}^2/\text{s}$ .

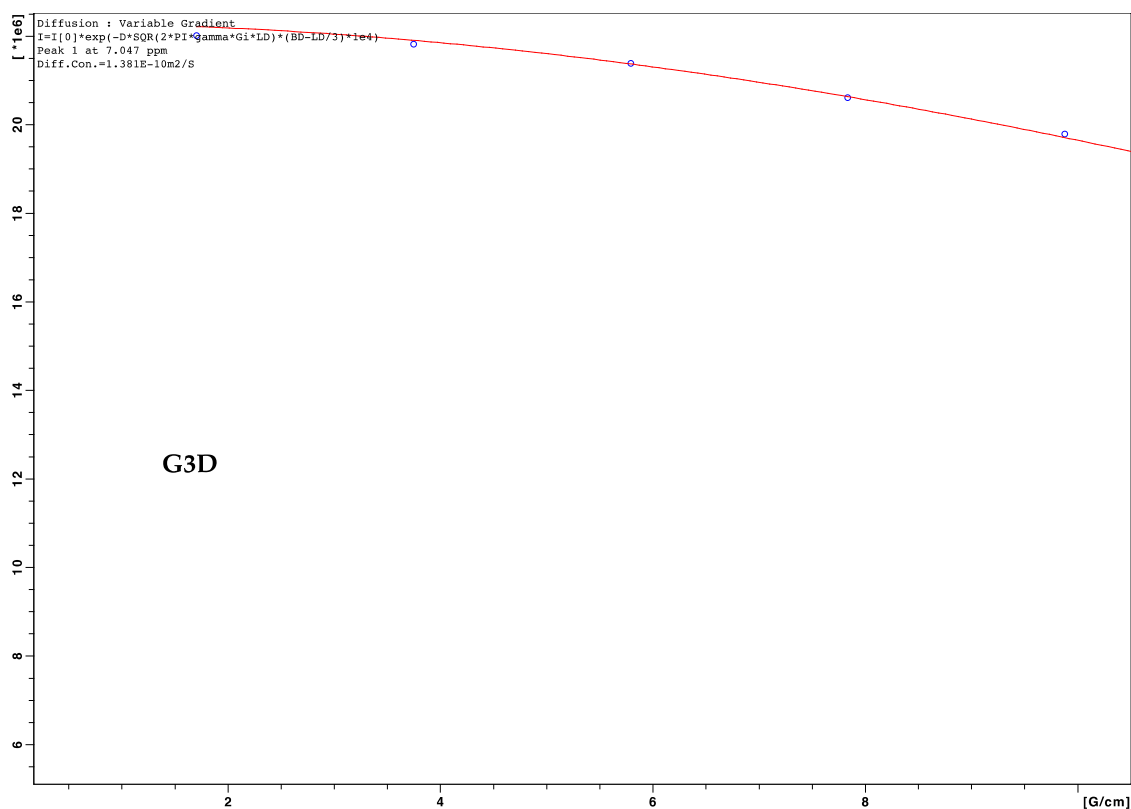

Figure S36. Showing fitting function after fitting with *SimFit* ( $T1/T2$ ) analysis. The fitting curve for the peak at 7.047 ppm of **G3D** (CDCl<sub>3</sub>, 298 K, 500 MHz) is shown.

#### 4. Mass spectrometric data of G2 – G3 dendrons and dendrimers.

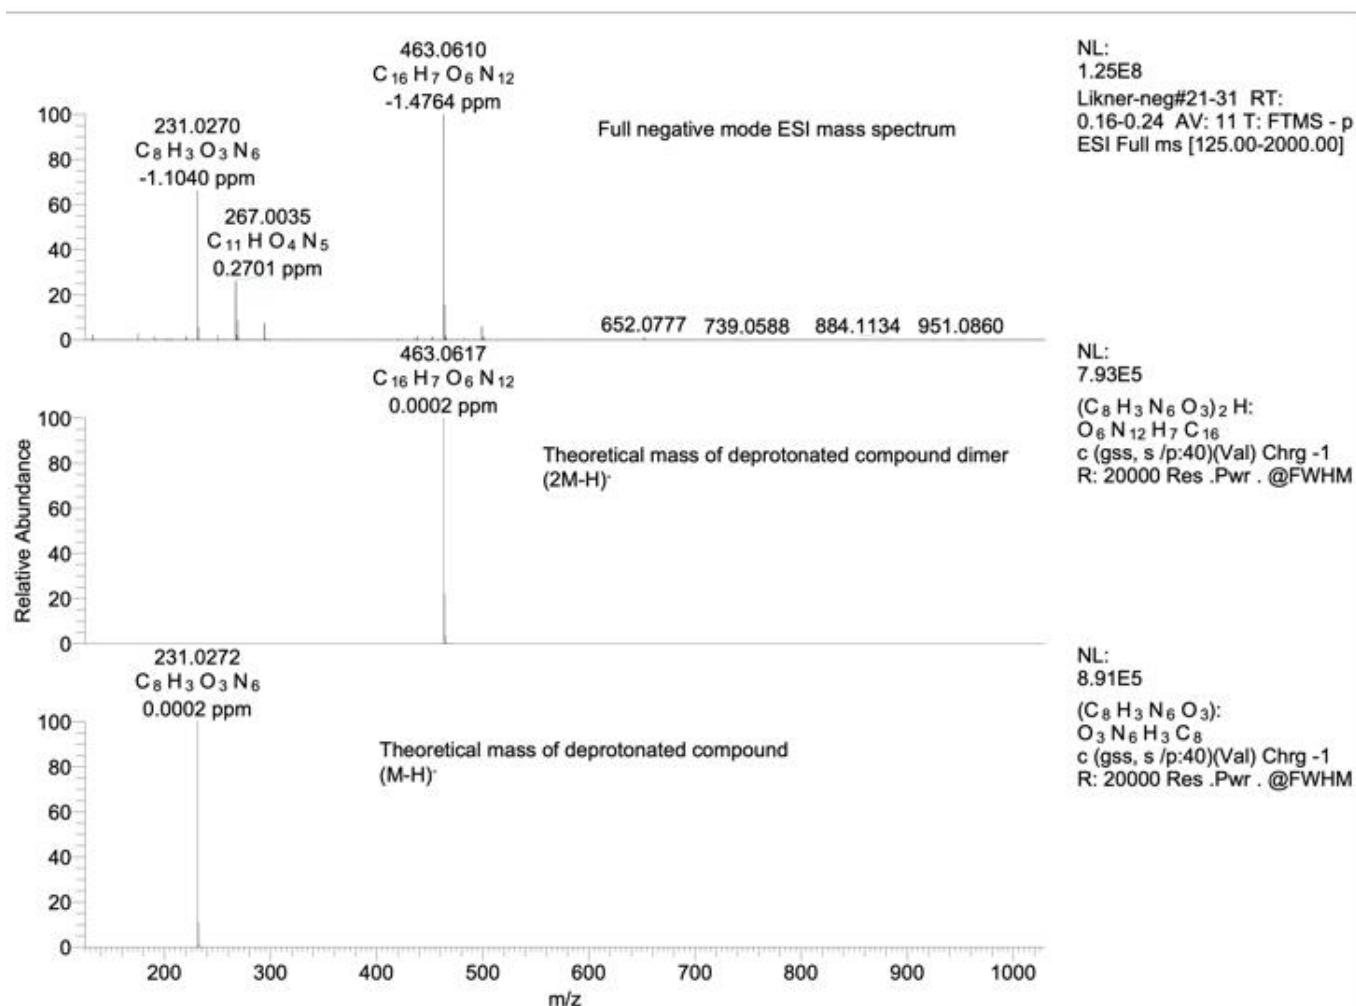

Figure S37. HRMS (ESI-LTQ-Orbitrap) of linking agent 4.

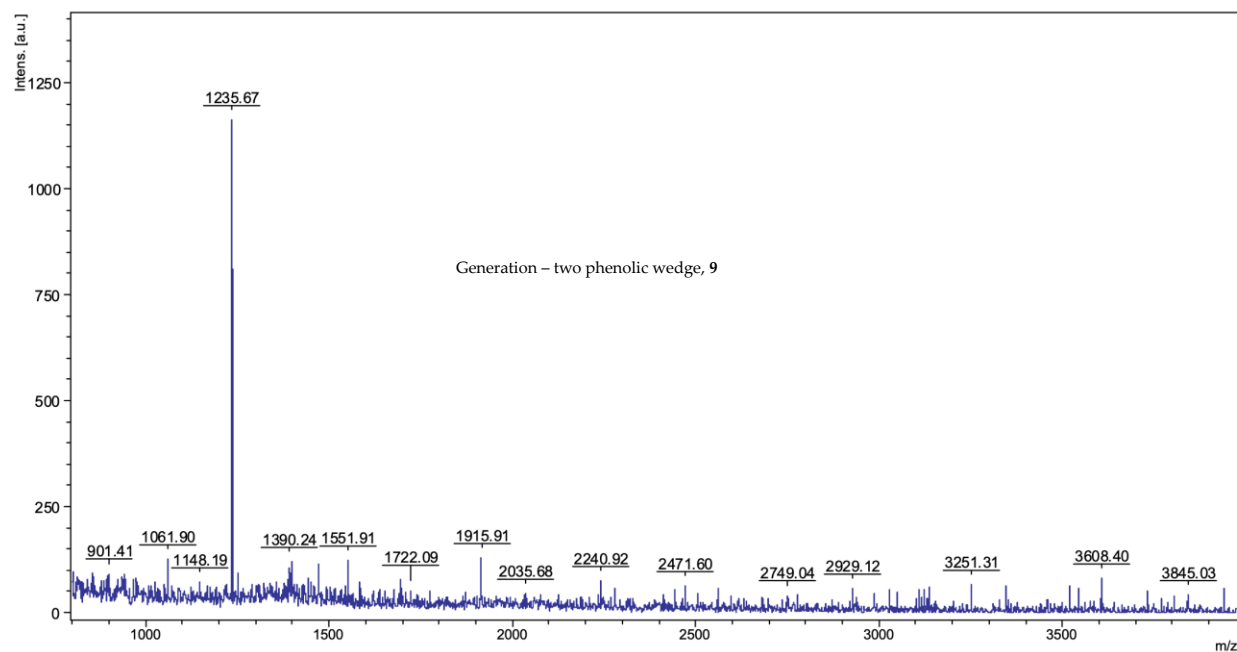

Figure S38. LRMS (MALDI-TOF-MS) of generation – two phenolic wedge **9**.

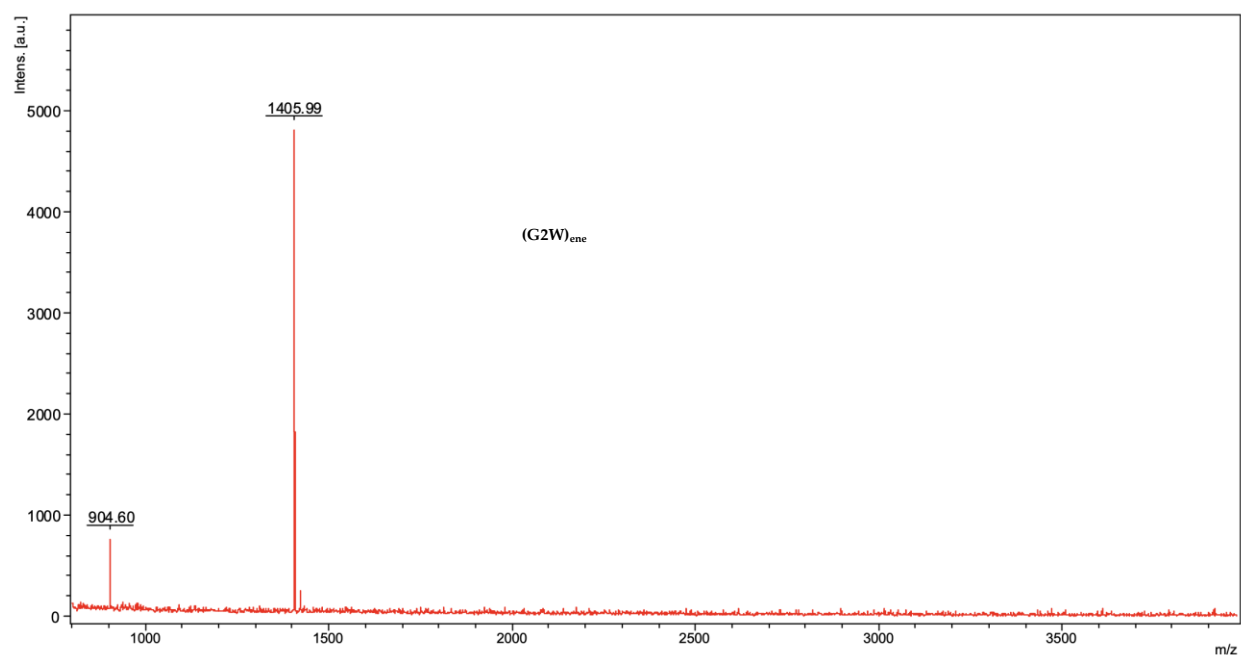

Figure S39. LRMS (MALDI-TOF-MS) of generation – two dendron with alkene periphery, **(G2W)<sub>ene</sub>**.

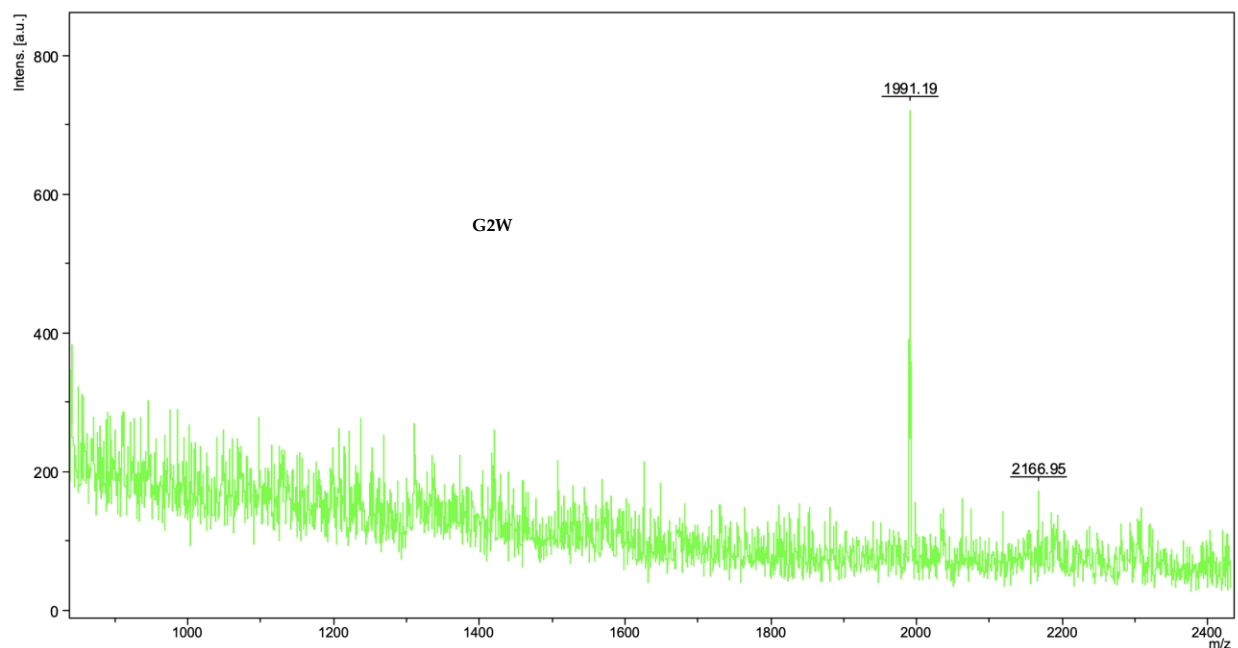

Figure S40. LRMS (MALDI-TOF-MS) of generation – two dendron with alkene periphery, **G2W**.

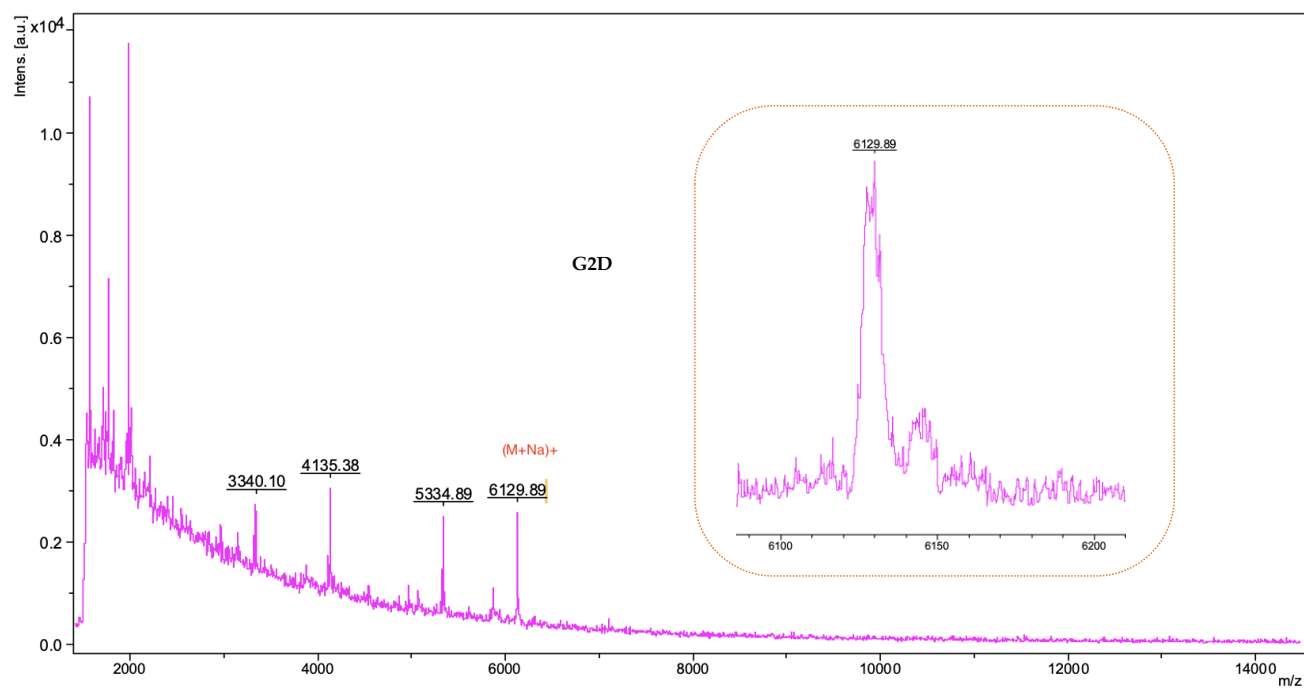

Figure S41. LRMS (MALDI-TOF-MS) of generation – two dendron with alkene periphery, **G2D**.

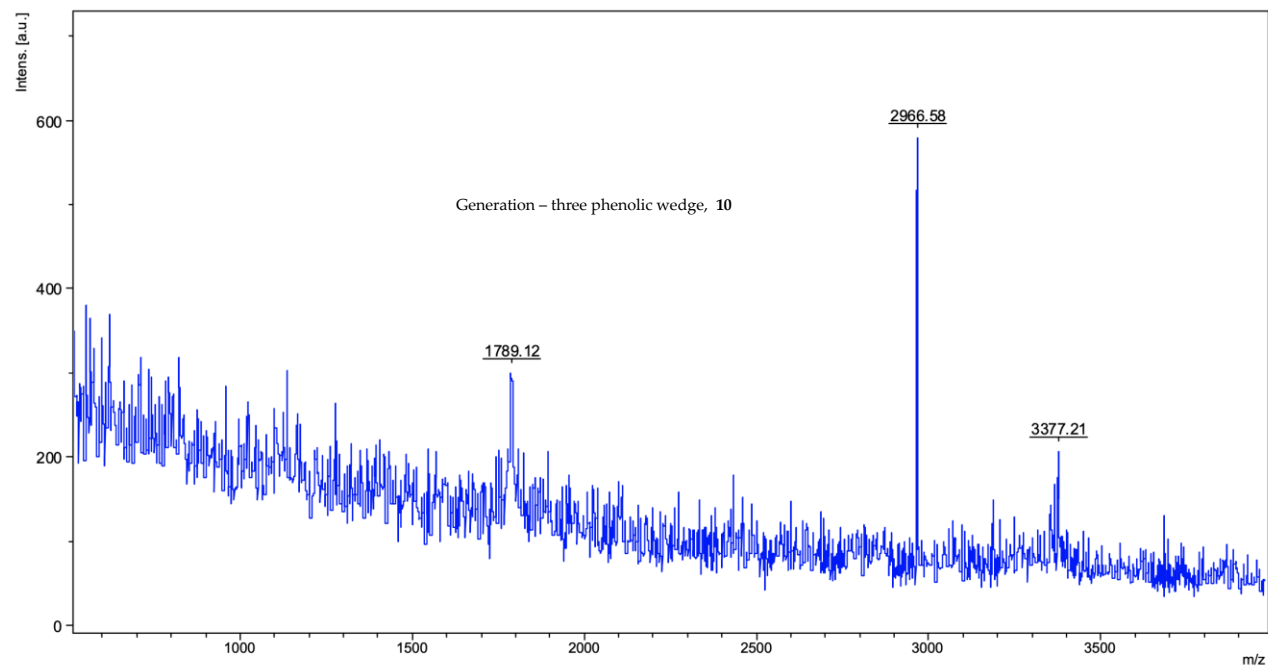

Figure S42. LRMS (MALDI-TOF-MS) of generation – three phenolic wedge **10**.

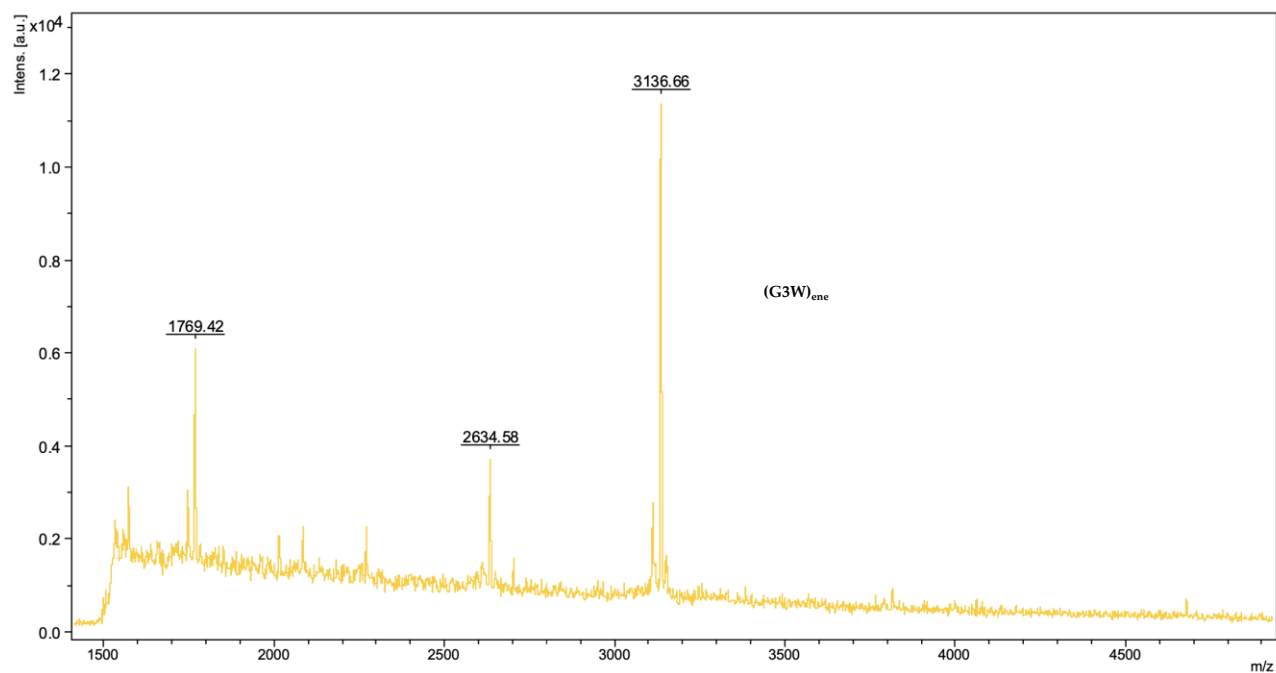

Figure S43. LRMS (MALDI-TOF-MS) of generation – three dendron with alkene periphery, **(G3W)<sub>ene</sub>**.



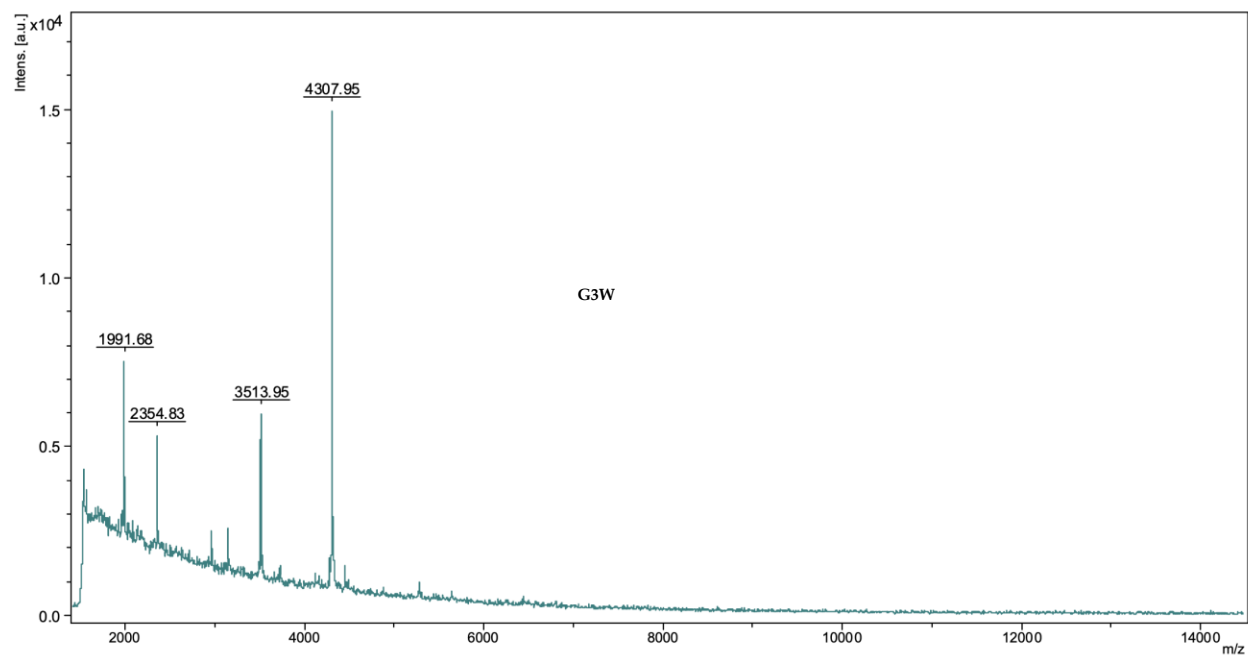

Figure S45. LRMS (MALDI-TOF-MS) of generation-two dendron with alkene periphery, **G3W**.

## 5. FT – IR spectra of G2 – G3 compounds

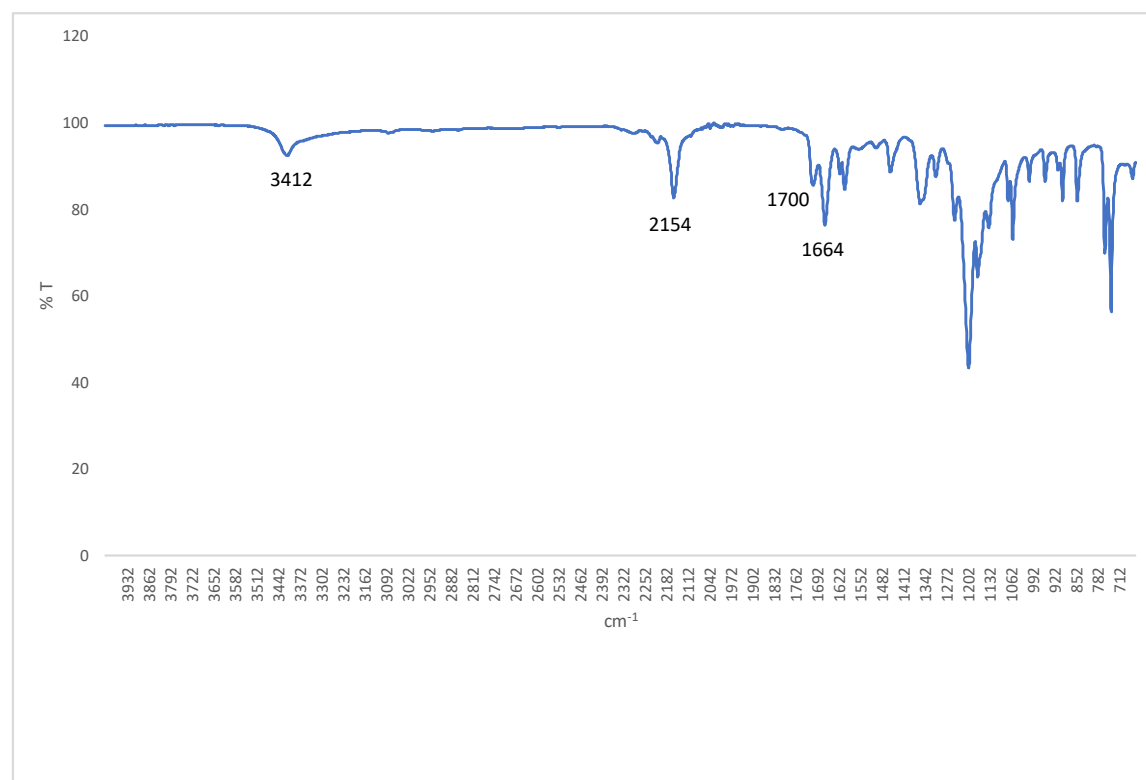

Figure S46. FT-IR spectrum of 5-hydroxy-1,3-benzenedicarbonyl diazide **4**.

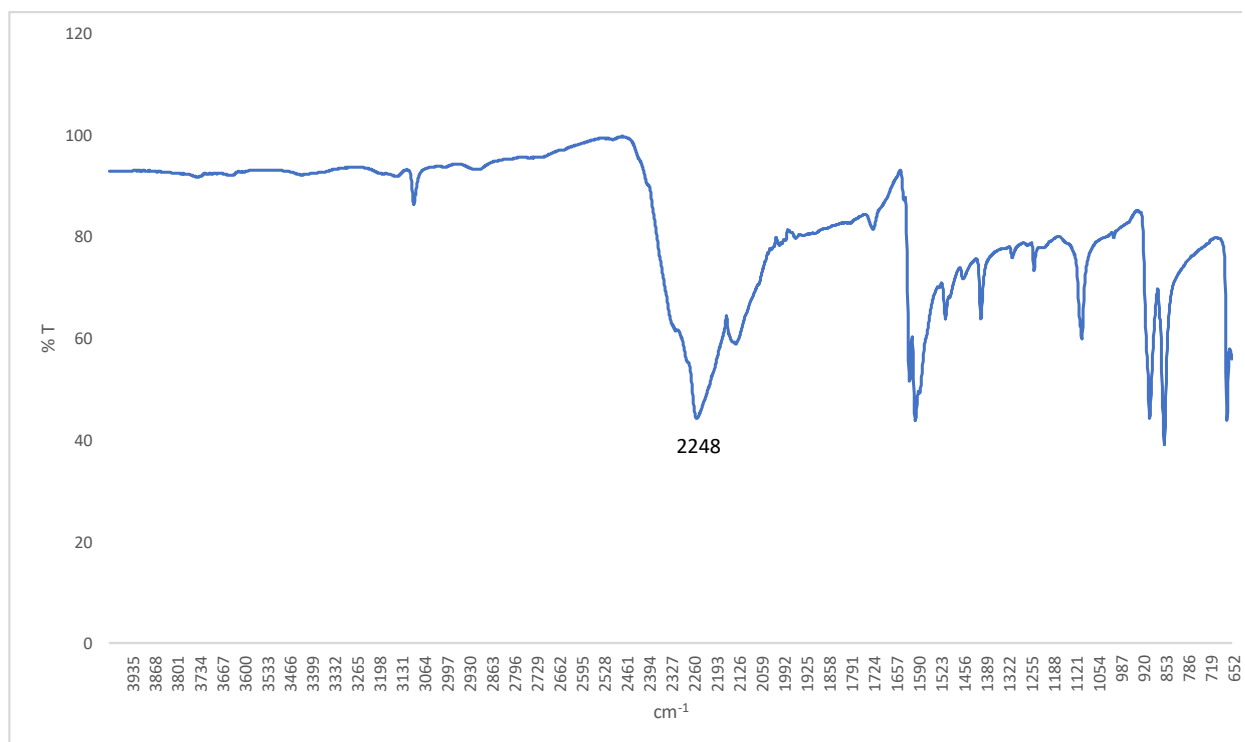

(a)

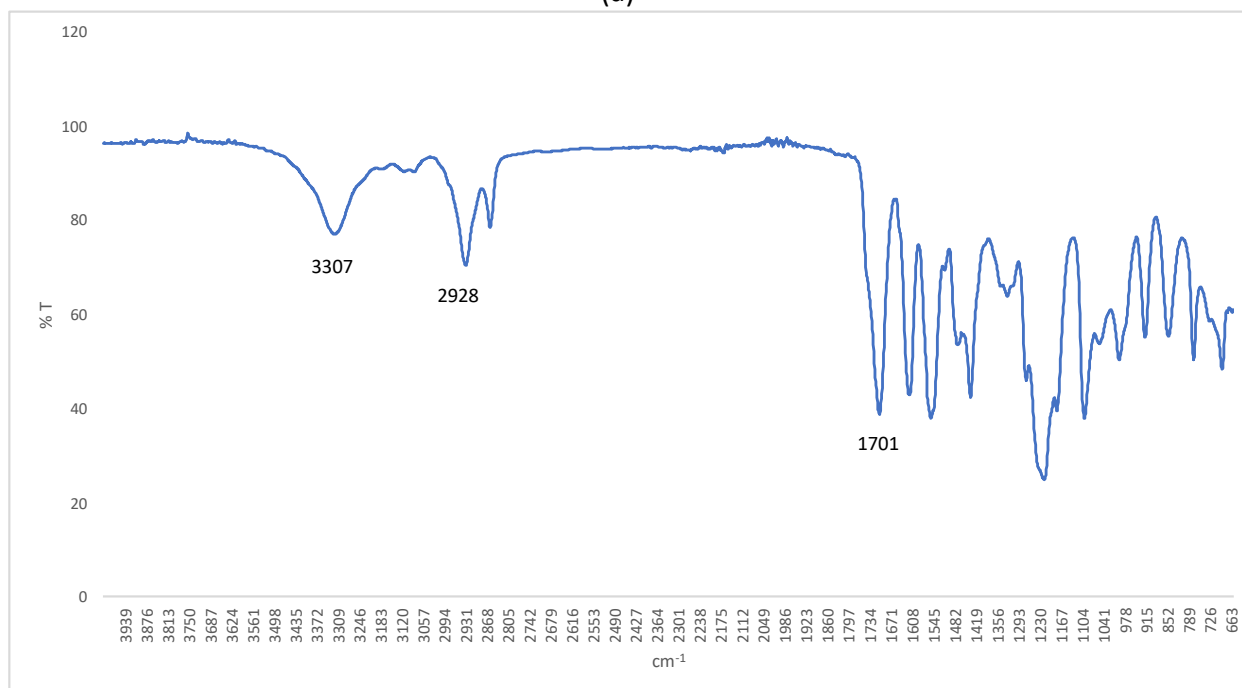

(b)

Figure S47. (a) FT-IR spectrum of 1,3,5-triisocyanatobenzene **6**. (b) FT-IR spectrum of G2 phenolic wedge **9**.

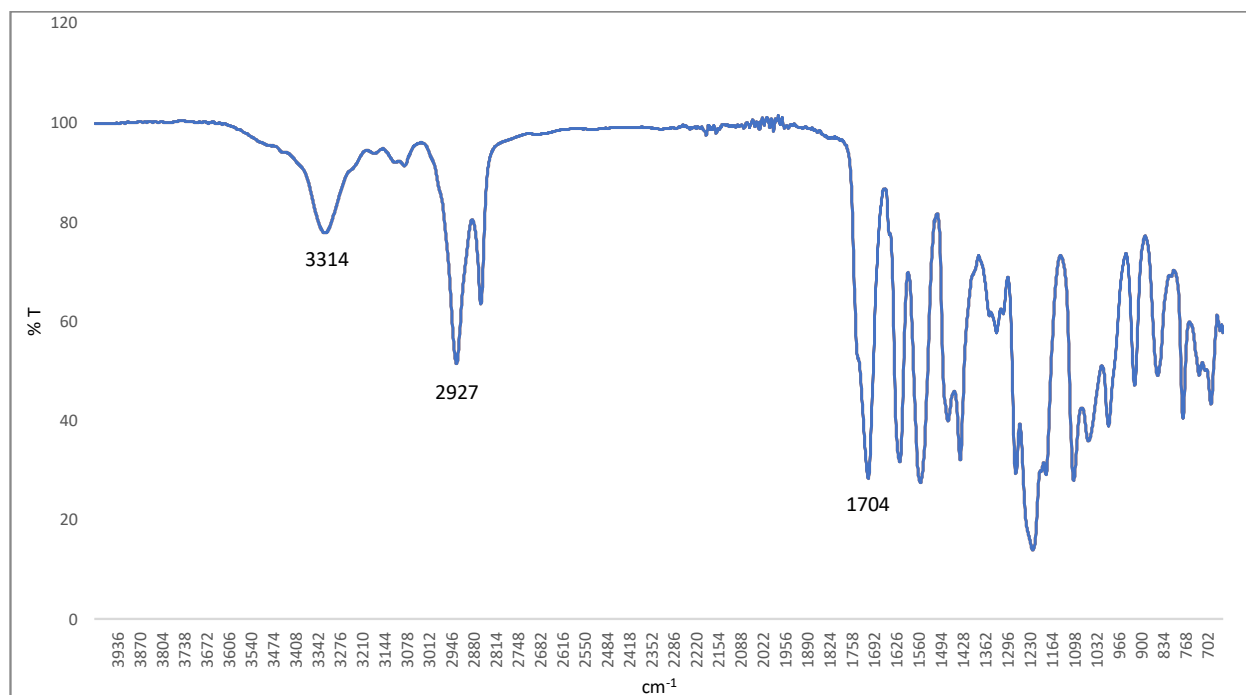

Figure S48. FT-IR spectrum of (G2W)<sub>ene</sub>.

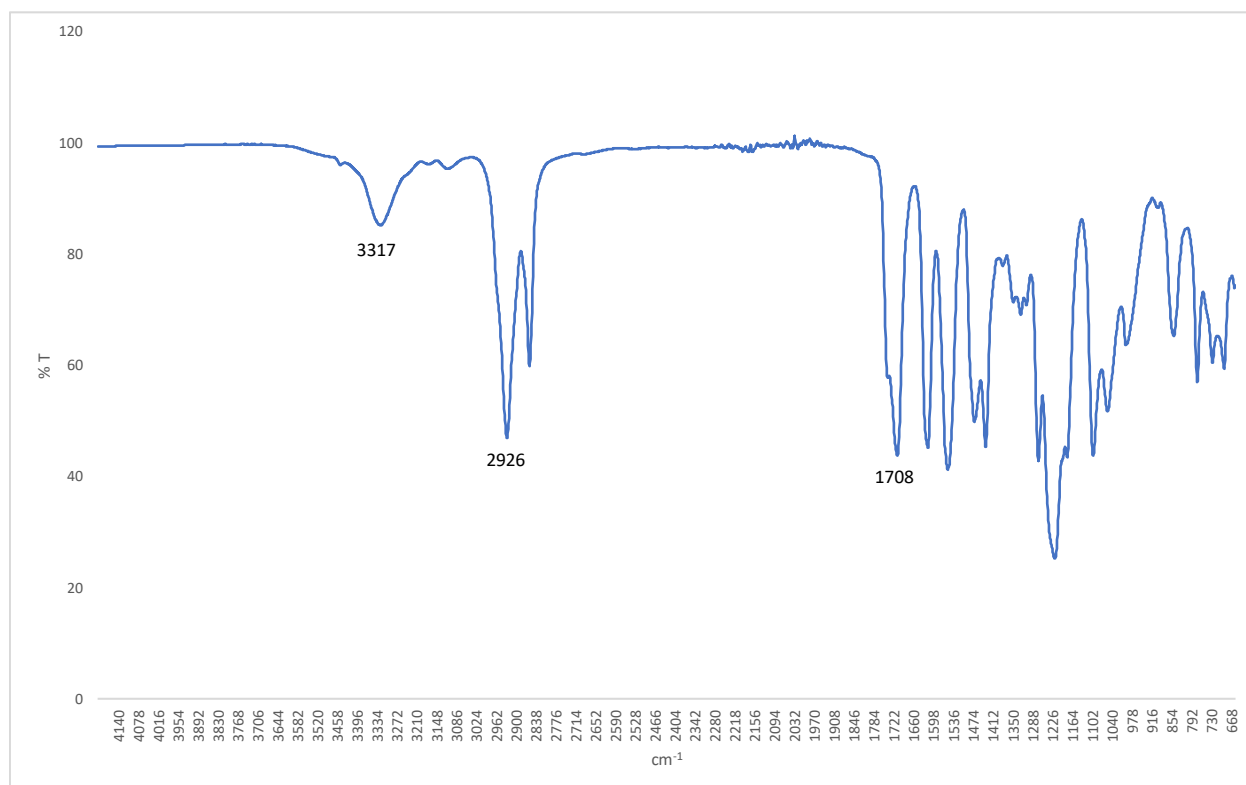

Figure S49. FT-IR spectrum of G2W.

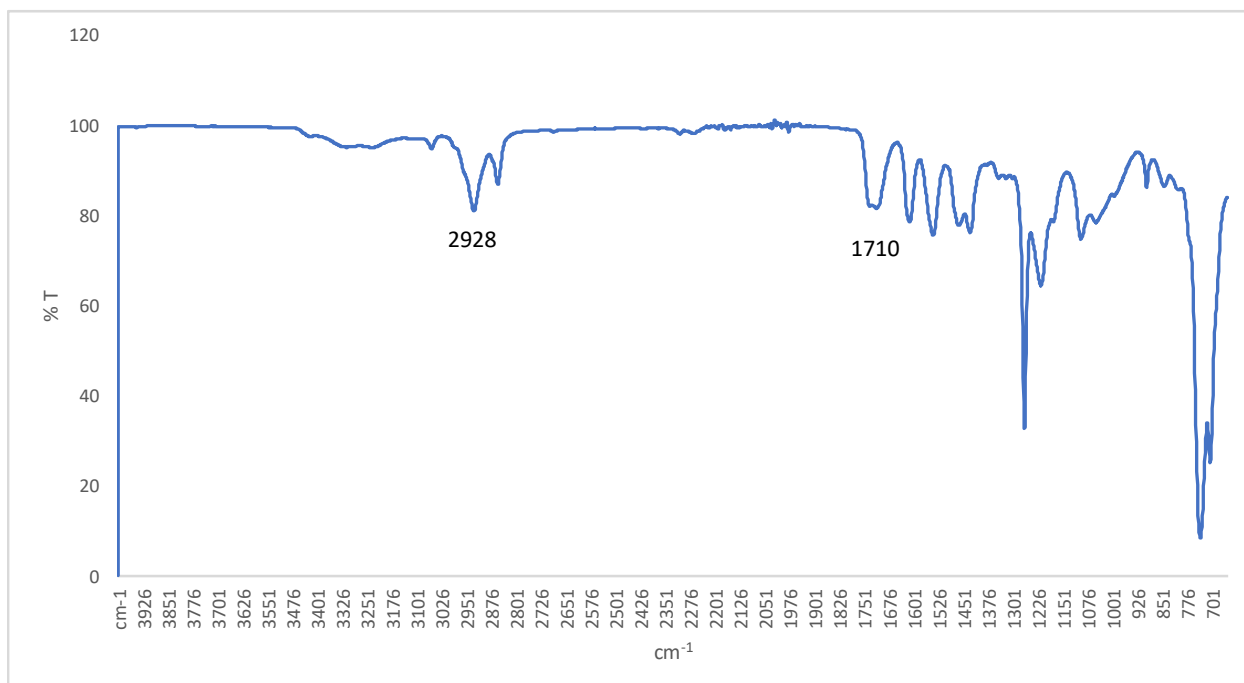

Figure S50. FT-IR spectrum of **G2D**.

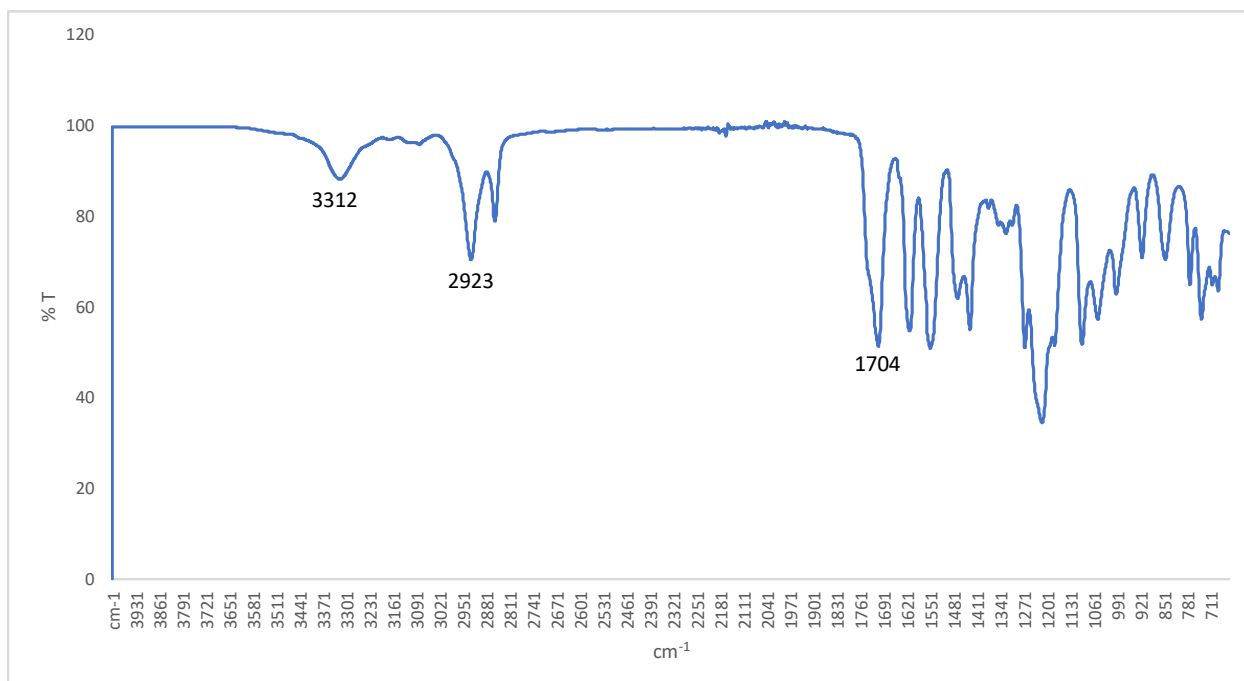

Figure S51. FT-IR spectrum of **(G3W)<sub>ene</sub>**.

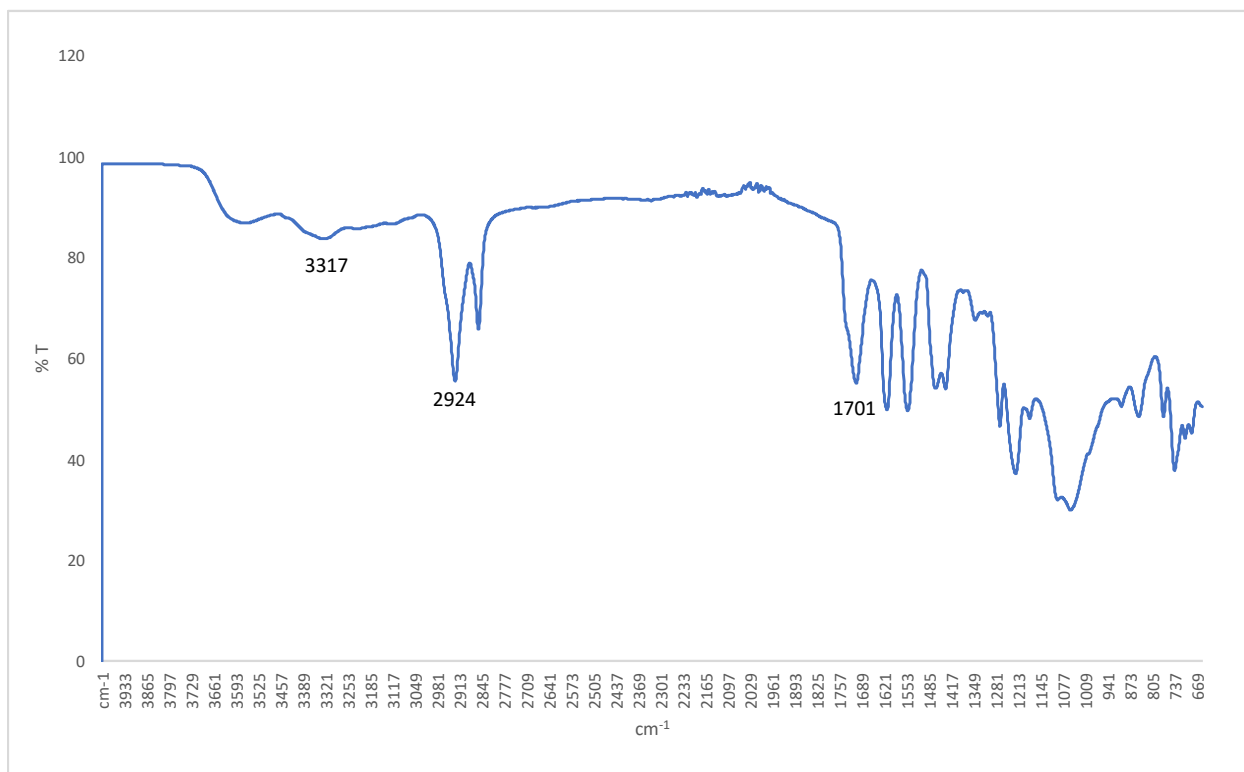

Figure S52. FT-IR spectrum of **G3W**.

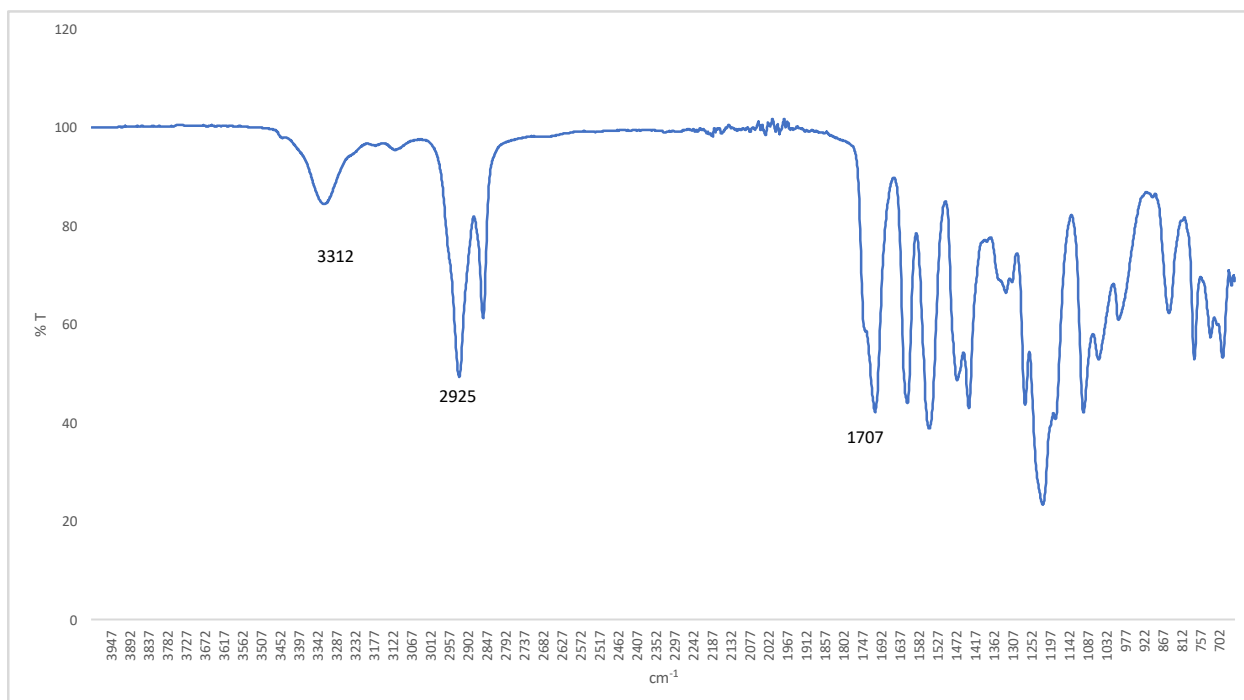

Figure S53. FT-IR spectrum of **G3D**.

## 6. UV-Vis and fluorescence study of G3 dendrimer (G3D).

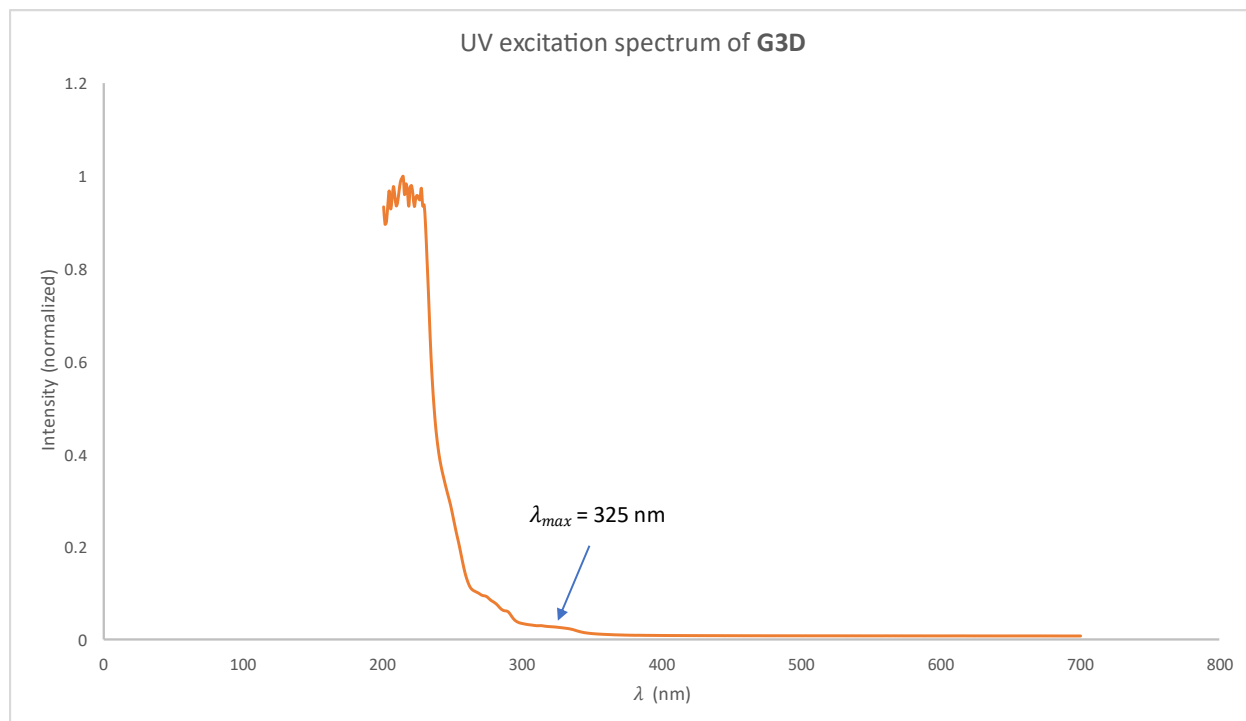

Figure S54. UV-Vis spectrum of **G3D** (measured at 1.3 mM concentration).

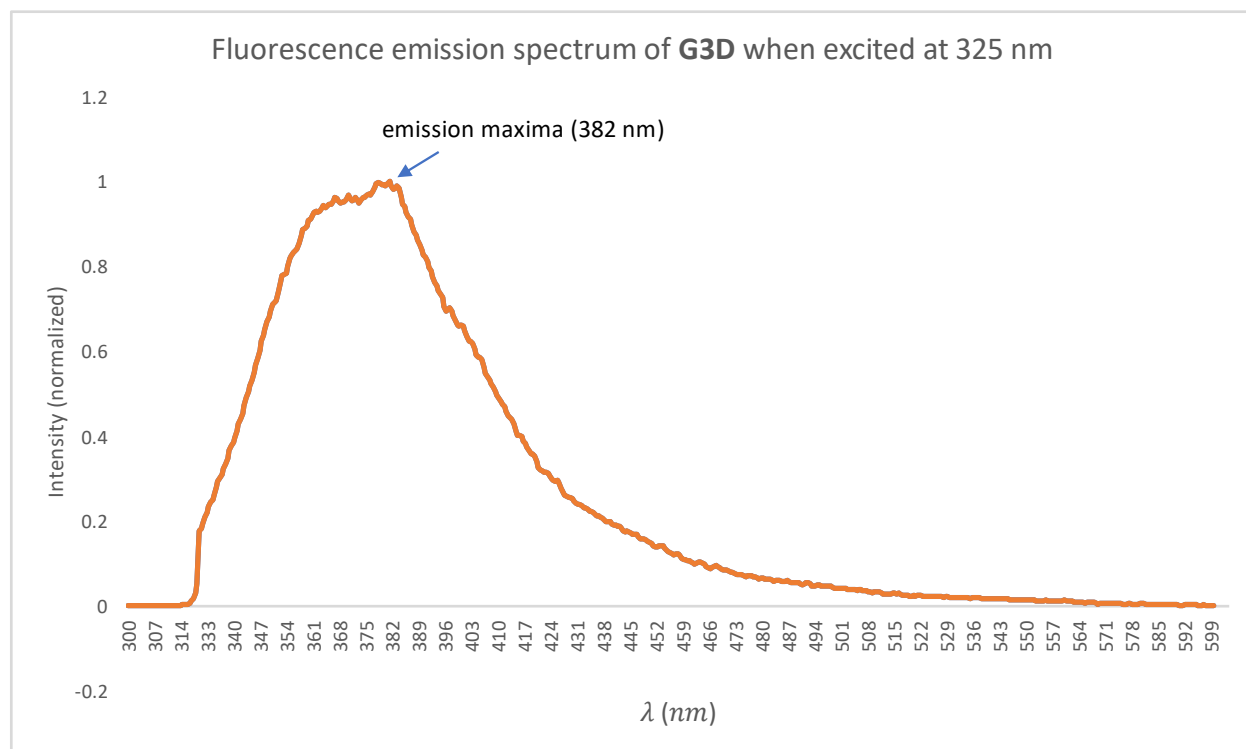

Figure S55. Emission spectrum of **G3D** (measured at 1.3 mM concentration). The data of the excitation portion (317 nm – 331 nm) are removed for clarity.
